# Supplementary material
Source: PubMed Central journal article supplement (PMC5749406)
Supplement: NIHMS928923-supplement-Supplemental.pdf [file NIHMS928923-supplement-Supplemental.pdf]

## Supplementary Materials for

### **Single-cut genome editing restores dystrophin expression in a new mouse model of muscular dystrophy**

Leonela Amoasii, Chengzu Long, Hui Li, Alex A. Mireault, John M. Shelton, Efrain Sanchez-Ortiz, John R. McAnally, Samadrita Bhattacharyya, Florian Schmidt, Dirk Grimm, Stephen D. Hauschka, Rhonda Bassel-Duby, Eric N. Olson\*

\*Corresponding author. Email: eric.olson@utsouthwestern.edu

Published 29 November 2017, *Sci. Transl. Med.* **9**, eaan8081 (2017)  
DOI: 10.1126/scitranslmed.aan8081

#### **This PDF file includes:**

##### Materials and Methods

Fig. S1.  $\Delta$ Ex50 mouse model analyses.

Fig. S2. Comparison of dystrophin staining in  $\Delta$ Ex50 and *mdx* mouse models at 1 month of age.

Fig. S3. Characterization of  $\Delta$ Ex50 mice at different ages.

Fig. S4. ESEs of exon 51.

Fig. S5. Validation of sgRNAs in mouse 10T1/2 and human 293T cells.

Fig. S6. Cas9 expression in injected muscles.

Fig. S7. In vivo *Dmd* gene editing.

Fig. S8. Off-target analyses for sgRNA-51.

Fig. S9. Off-target sequence analyses for sgRNA-51.

Fig. S10. Amplicon PCR deep-sequencing analyses for sgRNA-51.

Fig. S11. Rescue of dystrophin expression after intramuscular injection of AAV9-Cas9 and AAV9-sgRNA-51 in the  $\Delta$ Ex50 mouse model.

Fig. S12. AAV9-Cas9- and AAV9-sgRNA-51-injected muscle shows histological improvement after 3 weeks.

Fig. S13. Quantification of histological improvement of AAV9-Cas9- and AAV9-sgRNA-51-injected muscle from  $\Delta$ Ex50 mice after 3 weeks.

Fig. S14. Intramuscular injection of AAV9-Cas9 and AAV9-sgRNA-51 in  $\Delta$ Ex50 mice corrects dystrophin expression in the heart.

Fig. S15. AAV9-Cas9 expression after systemic delivery in mice.

Fig. S16. *Dmd* gene editing 4 weeks after systemic delivery of AAV9-Cas9 and AAV9-sgRNA-51 in mice.

Fig. S17. Rescue of dystrophin expression 8 weeks after systemic delivery of AAV9-Cas9 and AAV9-sgRNA-51 in  $\Delta$ Ex50 mice.

Fig. S18. Histological analysis of dystrophin correction 8 weeks after systemic delivery of AAV9-Cas9 and AAV9-sgRNA-51 in  $\Delta$ Ex50 mice.

Fig. S19. Histological improvement of  $\Delta$ Ex50 mice 4 weeks after systemic injection of AAV9-Cas9 and AAV9-sgRNA-51.

Table S1. Sequences of potential exonic off-target (OT) sites in the mouse genome.

Table S2. Sequences of top 45 off-target (OT) sites in the mouse genome.

Table S3. Primer sequences.

References (47, 48)

## **MATERIALS AND METHODS**

### **PCR and T7E1 analysis of genomic regions**

These methods were performed as previously described (16). PCR products were subcloned into pCRII-TOPO vector (Invitrogen) according to the manufacturer's instructions. Individual clones were picked and the DNA was sequenced.

### **Targeted deep DNA sequencing**

PCR of genomic DNA and cDNA from TA and cardiac muscles was performed using primers designed against the respective target region and off-target sites (**Table S1**). A second round of PCR was used to add Illumina flowcell binding sequences and experiment-specific barcodes on the 5' end of the primer sequence (**Table S1**). Before sequencing, DNA libraries were analyzed using a Bioanalyzer High Sensitivity DNA Analysis Kit (Agilent). Library concentration was then determined by qPCR using a KAPA Library Quantification Kit for Illumina platforms. The resulting PCR products were pooled and sequenced with 300 bp paired-end reads on an Illumina MiSeq instrument. Samples were demultiplexed according to assigned barcode sequences. FASTQ format data was analyzed using the CRISPResso software package version 1.0.8. (47).

### **Histological analysis of muscles and morphometric analysis**

Histological analysis of muscles was performed as described previously (16). Morphometric analyses of dystrophin-positive and total myofibers were carried out on replicates of whole step-sections of TA muscles and hearts. Scanned images were analyzed using Image J software. Dystrophin-positive myofibers were individually counted using Image J software, while number of total myofibers was estimated from

cell-counts per field area made from the mean of eight 10x objective images and extrapolated to the whole scanned section area.

### **Western blot analysis**

Western blot was performed as described previously(48). Antibodies to dystrophin (1:1000, D8168, Sigma-Aldrich), vinculin (1:1000, V9131, Sigma-Aldrich), goat anti-mouse and goat-anti rabbit HRP-conjugated secondary antibodies (1:3000, Bio-Rad) were used for the described experiments.

### **Grip strength test**

Muscle strength was assessed by a grip strength behavior task performed by the Neuro-Models Core Facility at UT Southwestern Medical Center. These measurements were performed as previously described (16) in a blinded way.

### **Serum creatine kinase (CK) measurement**

Mouse serum CK was measured by the Metabolic Phenotyping Core at UT Southwestern Medical Center. Serum CK level was measured using the VITROS 250 Chemistry System in a blinded way.

# SUPPLEMENTAL MATERIALS

## Supplementary Figures

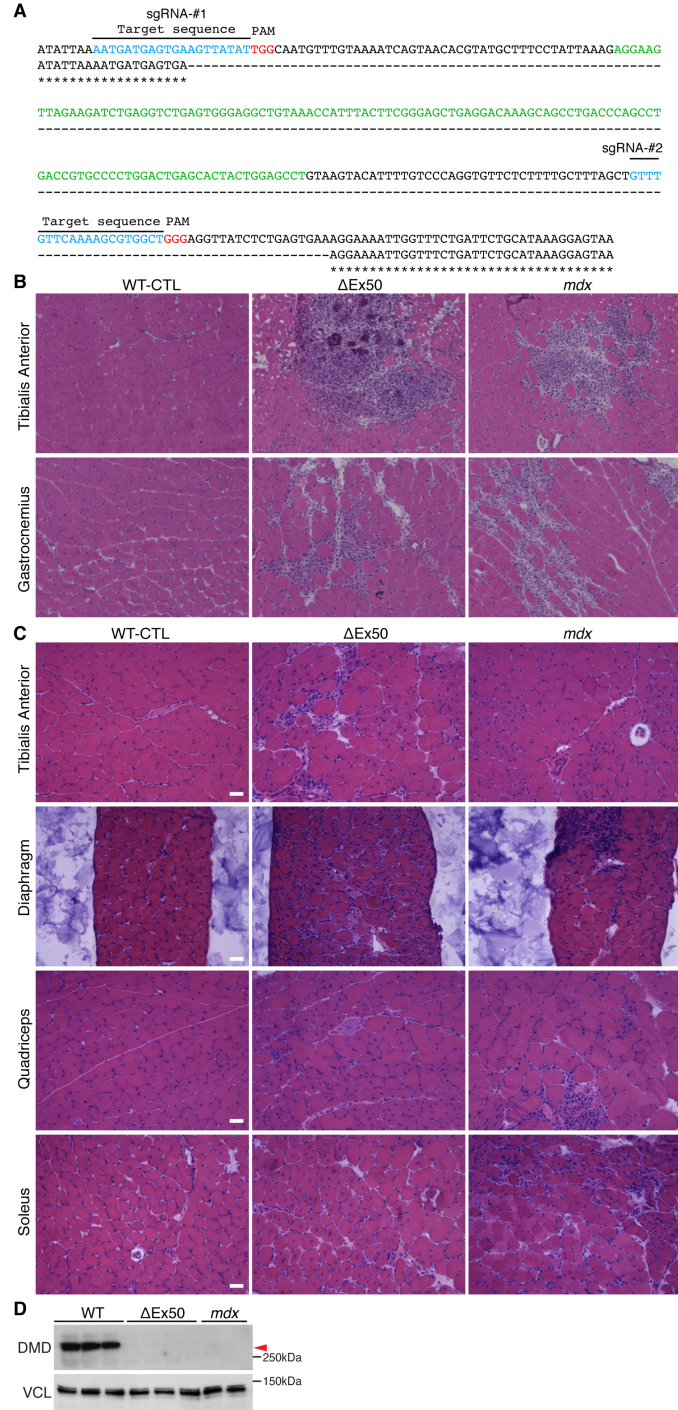

**Fig S1.  $\Delta$ Ex50 mouse model analyses.** (A) Genomic sequence of targeted locus (top line) and  $\Delta$ Ex50 founder (bottom line) with a 245 base pair deletion that eliminated exon 50 (indicated in green). sgRNA-#1 and #2 are indicated in blue. (B) Hematoxylin and eosin (H&E) staining of tibialis anterior and gastrocnemius muscles of 3 week old WT,  $\Delta$ Ex50 and *mdx* mice. (C) Hematoxylin and eosin (H&E) staining of tibialis anterior, diaphragm, quadriceps and soleus muscles of 1-month old WT,  $\Delta$ Ex50 and *mdx* mice. (D) Western blot analysis of dystrophin (DMD) and vinculin (VCL) expression in skeletal muscle of each group. n=5. Scale bar: 50 $\mu$ m.

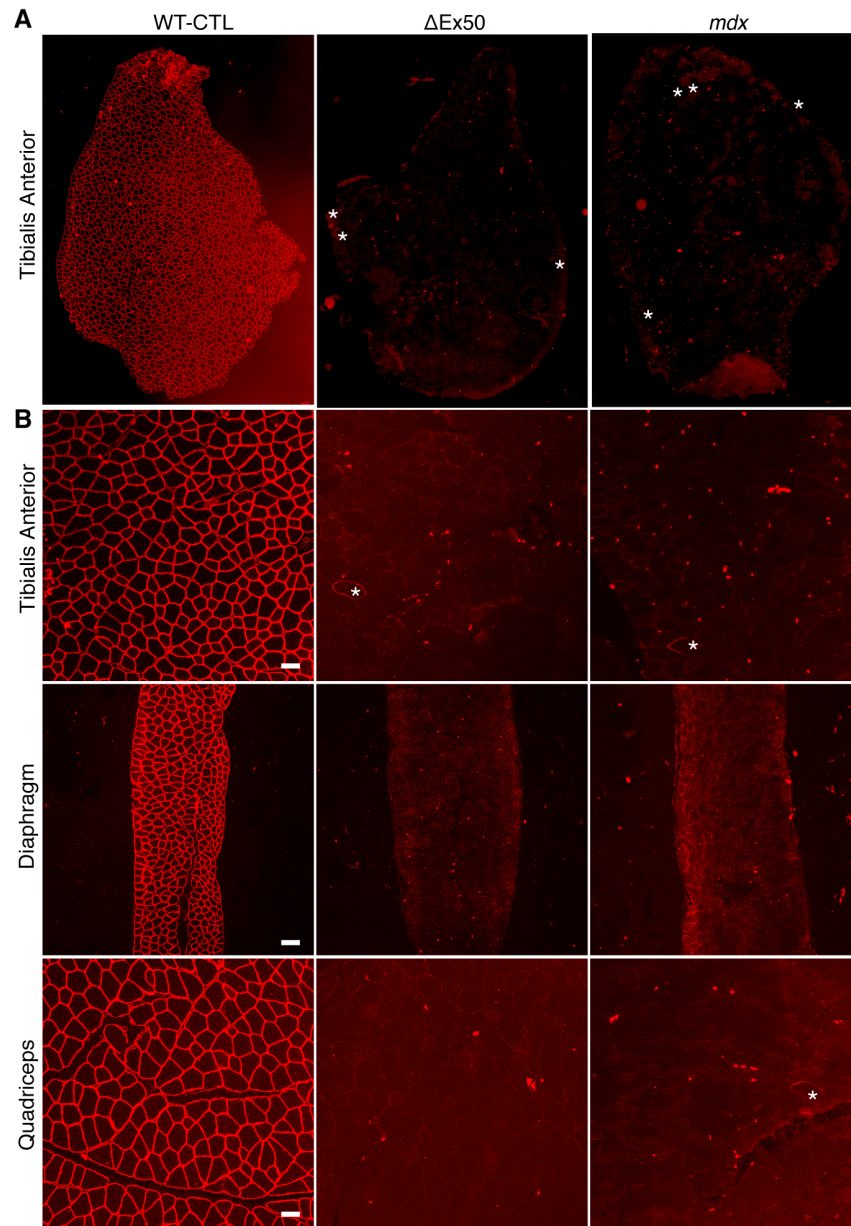

**Fig S2. Comparison of dystrophin staining in  $\Delta$ Ex50 and *mdx* mice at one month of age.** (A) Dystrophin immunohistochemistry of entire tibialis anterior of 1-month old WT,  $\Delta$ Ex50 and *mdx* mice. (B) Dystrophin immunohistochemistry of tibialis anterior, diaphragm and quadriceps muscles of 1-month old WT,  $\Delta$ Ex50 and *mdx* mice. Asterisk indicates revertant fibers. n=5. Scale bar: 50 $\mu$ m.

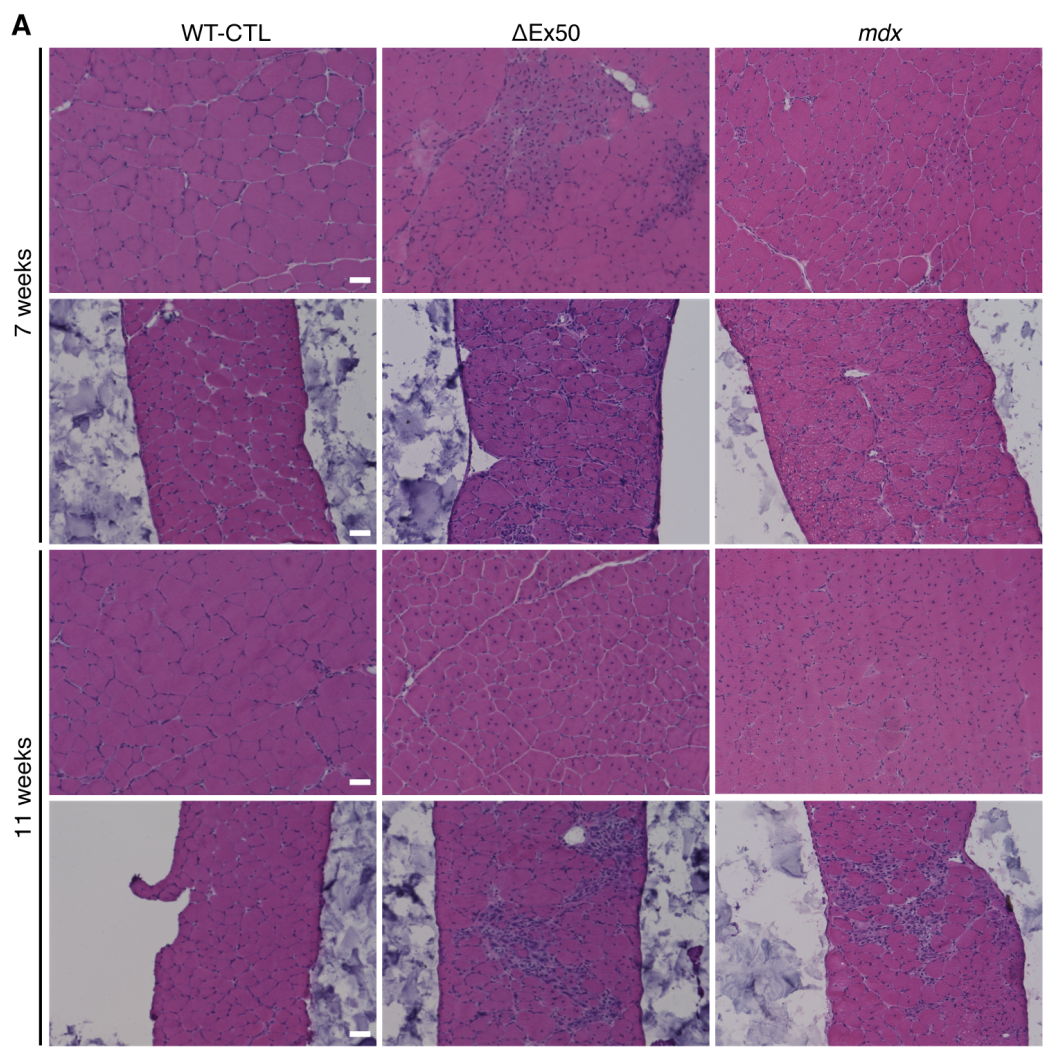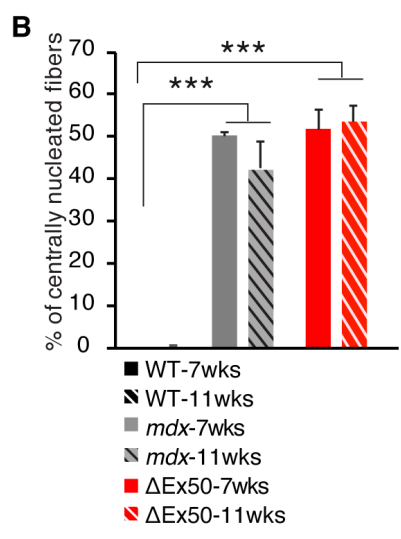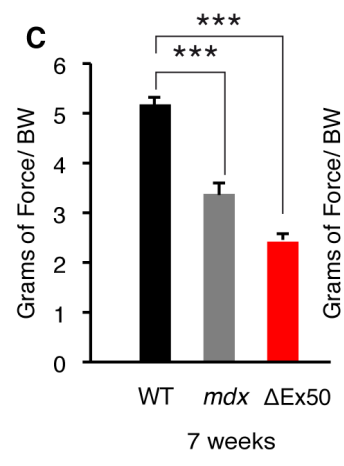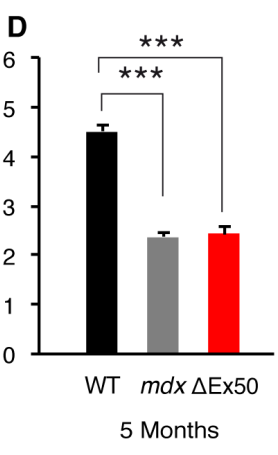



**Fig S3. Characterization of  $\Delta$ Ex50 mice at different ages.** (A) Hematoxylin and eosin (H&E) staining of tibialis anterior and diaphragm muscle of 7-week-old and 11-week-old WT,  $\Delta$ Ex50 and *mdx* mice. (B) Percentage of centrally nucleated fibers in tibialis anterior muscle of 7- and 11-week old WT,  $\Delta$ Ex50 and *mdx* mice. (C) WT, *mdx* and  $\Delta$ Ex50 mice were subjected to grip strength testing to measure muscle performance that was normalized by body weight (BW) (grams of force/BW) at 7-weeks and (D) 5-months of age. n=5. Scale bar: 50 $\mu$ m.

**A****Mouse Exon 51:**

CTGCCAGT**CAGACTGTTA**CTCTAGTGACACAATCTGTGGTTACTAAGGAAACTGTCATCTCCAACTAGAAATGCCATCTTCT  
 TTGCTGTTGGAGGTACCTGCCTGGCAGACTTCAACCGAGCTTGGACAGAACTTACAGACTGGCTGTCTCTGCTTGATCGAGT  
 TATAAAATCACAGAGAGTGATGGTGGGTGATCTGGAAGACATCAATGAAATGATCATCAAACAGAAG

**B**

| SRSF1<br>threshold: 1.956 |                |         | SRSF1 (IgM-BRCA1)<br>threshold: 1.867 |                |         | SRSF2<br>threshold: 2.383 |                 |         |
|---------------------------|----------------|---------|---------------------------------------|----------------|---------|---------------------------|-----------------|---------|
| Position                  | Site           | Score   | Position                              | Site           | Score   | Position                  | Site            | Score   |
| 9                         | <b>CAGACTG</b> | 3.49605 | 1                                     | CTGCCAG        | 1.96756 | 11                        | <b>GACTGTTA</b> | 2.78337 |
| 26                        | GACACAA        | 2.43404 | 9                                     | <b>CAGACTG</b> | 3.04097 | 38                        | GGTACTA         | 4.72957 |
| 43                        | CTAAGGA        | 2.55243 | 34                                    | CTGTGGT        | 2.49220 | 95                        | GGTACCTG        | 3.18459 |
| 62                        | CAAATA         | 2.15904 | 43                                    | CTAAGGA        | 2.99670 | 111                       | GACTCAA         | 3.62772 |
| 91                        | TGGAGGT        | 1.98779 | 62                                    | CAAATA         | 2.09258 | 127                       | GGACAGAA        | 2.58025 |
| 109                       | CAGACTT        | 3.86959 | 103                                   | CACTGGC        | 2.10803 | 148                       | TGTCTCTG        | 3.07384 |

**C****Human Exon 51:**

CTCCTACT**CAGACTGTTA**CTCTGGTGACACAACCTGTGGTTACTAAGGAAACTGCCATCTCCAACTAGAAATGCCATCTTCC  
 TTGATGTTGGAGGTACCTGCTCTGGCAGATTTCAACCGGGCTTGGACAGAACTTACCGACTGGCTTTCTCTGCTTGATCAAGT  
 TATAAAATCACAGAGGGTGATGGTGGGTGACCTTGAGGATATCAACGAGATGATCATCAAGCAGAAG

**D**

| SRSF1<br>threshold: 1.956 |                |         | SRSF1 (IgM-BRCA1)<br>threshold: 1.867 |                |         | SRSF2<br>threshold: 2.383 |                 |         |
|---------------------------|----------------|---------|---------------------------------------|----------------|---------|---------------------------|-----------------|---------|
| Position                  | Site           | Score   | Position                              | Site           | Score   | Position                  | Site            | Score   |
| 9                         | <b>CAGACTG</b> | 3.49605 | 9                                     | <b>CAGACTG</b> | 3.04097 | 11                        | <b>GACTGTTA</b> | 2.78337 |
| 19                        | CTCTGGT        | 2.05834 | 19                                    | CTCTGGT        | 2.87347 | 31                        | AACCTGTG        | 2.66418 |
| 26                        | GACACAA        | 2.43404 | 34                                    | CTGTGGT        | 2.49220 | 38                        | GGTACTA         | 4.72957 |
| 43                        | CTAAGGA        | 2.55243 | 43                                    | CTAAGGA        | 2.99670 | 95                        | GGTACCTG        | 3.18459 |
| 62                        | CAAATA         | 2.15904 | 52                                    | CTGCCAT        | 2.17523 | 111                       | GACTCAA         | 3.62772 |
| 91                        | TGGAGGT        | 1.98779 | 62                                    | CAAATA         | 2.09258 | 127                       | GGACAGAA        | 2.58025 |

**Fig S4. Exon splicing enhancers (ESEs) of exon 51. (A)** Mouse Exon 51 sequence with the predicted exon splicing enhancers (ESEs) located at the site of sgRNA is indicated in red. **(B)** Mouse ESE sites of exon 51 predicted using ESEfinder3. **(C)** Human Exon 51 sequence with the predicted exon splicing enhancers (ESEs) located at the site of sgRNA is indicated in red. **(D)** Human ESE sites of exon 51 predicted using ESEfinder3.

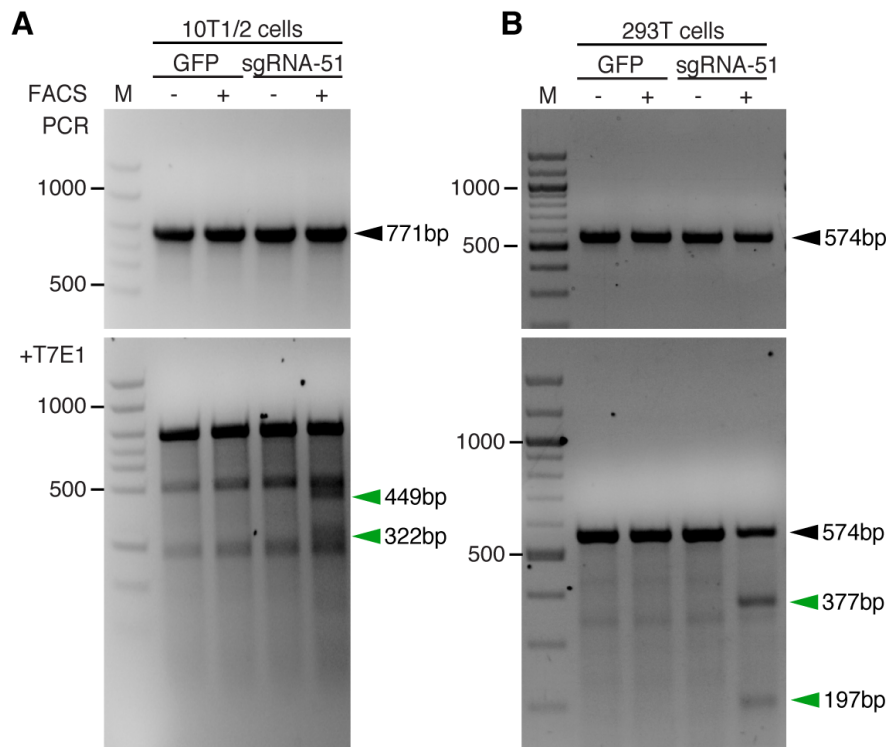

**C**

Target Sequence

Mouse-sgRNA : GTCAGACTGTTACTCTAGTG  
 Human-sgRNA : CTCAGACTGTTACTCTGGTG

**D**

|       | PAM ▼                                                  | %Reads  |
|-------|--------------------------------------------------------|---------|
| WT    | ttttagCTCCTA <u>CTCAGACTGTTACTCTGGTG</u> GACACAACCTGTG | 64.3079 |
| (+1)  | ttttagCTCCTACTCAAGACTGTTACTCTGGTGACACAACCTGTG          | 21.5385 |
| (+1)  | ttttagCTCCTACTCCAGACTGTTACTCTGGTGACACAACCTGTG          | 5.3930  |
| (-2)  | ttttagCTCCTA--CAGACTGTTACTCTGGTGACACAACCTGTG           | 0.7932  |
| (-1)  | ttttagCTCCTACT-AGACTGTTACTCTGGTGACACAACCTGTG           | 0.3759  |
| (-2)  | ttttagCTCCTACT--GACTGTTACTCTGGTGACACAACCTGTG           | 0.1999  |
| (-4)  | ttttagCTCCTA----AGACTGTTACTCTGGTGACACAACCTGTG          | 0.0030  |
| (-5)  | ttttagCTCC-----CAGACTGTTACTCTGGTGACACAACCTGTG          | 0.0018  |
| (-3)  | ttttagCTCCTAC----AGACTGTTACTCTGGTGACACAACCTGTG         | 0.0018  |
| (-13) | -----CTCAGACTGTTACTCTGGTGACACAACCTGTG                  | 0.0006  |

**Fig S5. Validation of sgRNAs in mouse 10T1/2 and human 293T cells.** (A) Cas9 was expressed in the presence or absence of mouse sgRNA-51 in 10T1/2 cells and gene editing was monitored by T7E1 assay in fluorescence-based cell sorted (FACS) (+) and non-sorted cells (-). GFP was used as a control. Guide RNA-51 is defined in

Figure 2. Undigested PCR products (upper panel) and T7E1 digestion (lower panel) are shown on a 2% agarose gel. Black arrowhead indicates the undigested 771bp PCR band. Green arrowheads in the lower panel indicate the cut bands by T7E1 assay. M denotes size marker lane. bp indicates the length of the marker bands. **(B)** Cas9 was expressed in the presence or absence of human sgRNA-51 in 293T cells and gene editing was monitored by T7E1 assay in fluorescence-based cell sorted (FACS) (+) and non-sorted cells (-). GFP was used as a control. Undigested PCR products (upper panel) and T7E1 digestion (lower panel) are shown on a 2% agarose gel. Black arrowhead indicates the undigested 574bp PCR band. Green arrowheads in the lower panel indicate the cut bands by T7E1 assay. M denotes size marker lane. bp indicates the length of the marker bands. **(C)** Alignment of mouse and human target sequence conservation. Highlighted in red are nucleotide difference in target sequence. **(D)** Sequence of representative indels aligned with sgRNA sequence (indicated in blue) revealing deletions and insertions. Black arrowhead indicates the cleavage site.

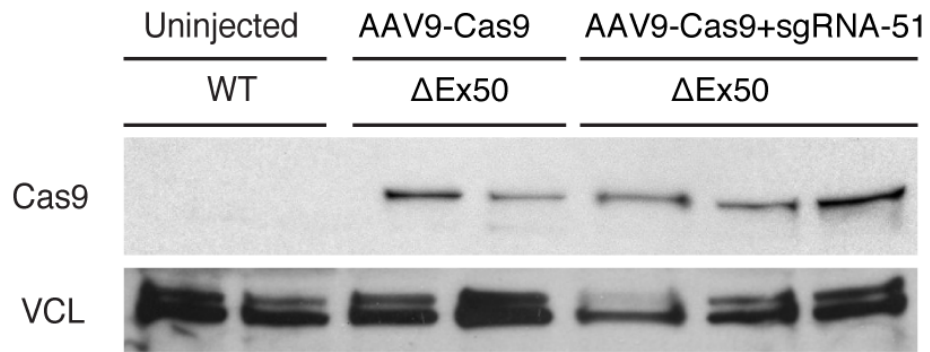

**Fig S6. Cas9 expression in injected muscles.** Western blot analysis of Cas9 and vinculin (VCL) expression in tibialis anterior muscles 3 weeks after intramuscular injection.

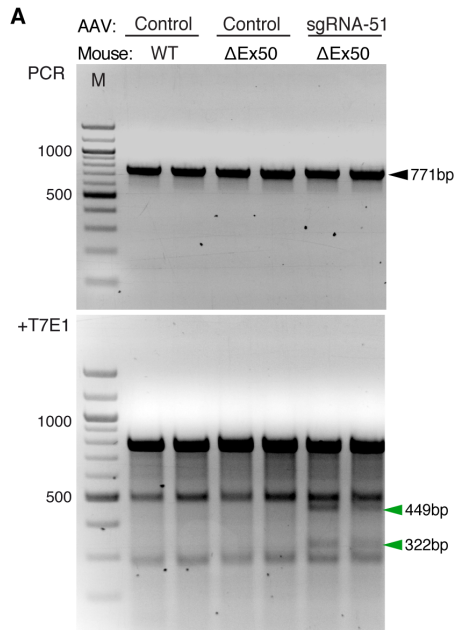

**B  $\Delta$ Ex50-AAV9-sgRNA-51-TA-#1**

|      |                                                  | %Reads | #Reads |
|------|--------------------------------------------------|--------|--------|
|      | PAM<br>▼                                         |        |        |
| (NE) | acactagCTG <b>CCAGTCAGACTGTTACTCTAGTGACA</b>     | 67.17  | 36253  |
| (+1) | acactagCTGCCAGTCA <b>A</b> AGACTGTTACTCTAGTGACA  | 18.24  | 9846   |
| (S1) | acactagCTGCCAGTCA <b>A</b> TACTGTTACTCTAGTGACA   | 1.17   | 631    |
| (+2) | acactagCTGCCAGTCA <b>AT</b> AGACTGTTACTCTAGTGACA | 0.64   | 345    |
| (S1) | acactagCTGCCAGTCA <b>ACT</b> TACTCTAGTGACA       | 0.57   | 309    |
| (+2) | acactagCTGCCAGTCA <b>AA</b> AGACTGTTACTCTAGTGACA | 0.49   | 263    |
| (-2) | acactagCTGCCAGTCA <b>--</b> ACTGTTACTCTAGTGACA   | 0.36   | 194    |
| (+2) | acactagCTGCCAGTCA <b>CA</b> AGACTGTTACTCTAGTGACA | 0.30   | 164    |
| (-1) | acactagCTGCCAGTCA <b>-</b> GACTGTTACTCTAGTGACA   | 0.17   | 92     |
| (-4) | acactagCTGCCAGTCA <b>---</b> CTGTTACTCTAGTGACA   | 0.09   | 51     |
| (-6) | acactagCTG <b>-----</b> AGACTGTTACTCTAGTGACA     | 0.09   | 51     |
| (-4) | acactagCTGCCAGTCA <b>----</b> GTTACTCTAGTGACA    | 0.09   | 50     |

**$\Delta$ Ex50-AAV9-sgRNA-51-TA-#2**

|      |                                                  | %Reads | #Reads |
|------|--------------------------------------------------|--------|--------|
|      | PAM<br>▼                                         |        |        |
| (NE) | acactagCTG <b>CCAGTCAGACTGTTACTCTAGTGACA</b>     | 72.79  | 39665  |
| (+1) | acactagCTGCCAGTCA <b>A</b> AGACTGTTACTCTAGTGACA  | 15.43  | 8407   |
| (S1) | acactagCTGCCAGTCA <b>A</b> TACTGTTACTCTAGTGACA   | 1.02   | 556    |
| (-2) | acactagCTGCCAGTCA <b>--</b> ACTGTTACTCTAGTGACA   | 0.34   | 183    |
| (+2) | acactagCTGCCAGTCA <b>CA</b> AGACTGTTACTCTAGTGACA | 0.31   | 171    |
| (+2) | acactagCTGCCAGTCA <b>AT</b> AGACTGTTACTCTAGTGACA | 0.30   | 162    |
| (+2) | acactagCTGCCAGTCA <b>AA</b> AGACTGTTACTCTAGTGACA | 0.25   | 135    |
| (S1) | acactagCTGCCAGTCA <b>AA</b> ACTTACTCTAGTGACA     | 0.27   | 147    |
| (S1) | acactagCTGCCAGTCA <b>CA</b> CTGTTACTCTAGTGACA    | 0.21   | 113    |
| (-1) | acactagCTGCCAGTCA <b>-</b> GACTGTTACTCTAGTGACA   | 0.10   | 54     |
| (-1) | acactagCTGCCAGTCA <b>-</b> TGTCACTAGAGTAACAGT    | 0.04   | 21     |
| (-4) | acactagCTGCCAGTCA <b>----</b> TGTACTCTAGTGACA    | 0.04   | 20     |

**$\Delta$ Ex50-AAV9-sgRNA-51-TA-#3**

|        |                                                  | %Reads | #Reads |
|--------|--------------------------------------------------|--------|--------|
|        | PAM<br>▼                                         |        |        |
| (NE)   | acactagCTG <b>CCAGTCAGACTGTTACTCTAGTGACA</b>     | 76.19  | 40992  |
| (+1)   | acactagCTGCCAGTCA <b>A</b> AGACTGTTACTCTAGTGACA  | 12.38  | 6659   |
| (S1)   | acactagCTGCCAGTCA <b>A</b> TACTGTTACTCTAGTGACA   | 1.12   | 603    |
| (+2)   | acactagCTGCCAGTCA <b>AA</b> AGACTGTTACTCTAGTGACA | 0.33   | 175    |
| (+1S1) | acactagCTGCCAGTCA <b>AA</b> ACTTACTCTAGTGACA     | 0.24   | 131    |
| (-1)   | acactagCTGCCAGTCA <b>-</b> TGTCACTAGAGTAACAGT    | 0.18   | 96     |
| (S1)   | acactagCTGCCAGTCA <b>CA</b> ACTGTTACTCTAGTGACA   | 0.15   | 79     |
| (-2)   | acactagCTGCCAGTCA <b>--</b> TGTCACTAGAGTAACAGT   | 0.12   | 67     |
| (S1)   | acactagCTGCCAGTCA <b>CA</b> CTGTTACTCTAGTGACA    | 0.11   | 58     |
| (S1)   | acactagCTGCCAGT <b>T</b> AGACTGTTACTCTAGTGACA    | 0.08   | 45     |
| (-4)   | acactagCTGCCAGT <b>----</b> TGTCACTAGAGTAACAG    | 0.05   | 25     |
| (-6)   | acactagCTGCCAGTCA <b>-----</b> TGTCACTAGAGTA     | 0.04   | 22     |

**Fig S7. In vivo *Dmd* gene editing.** (A) Undigested PCR products (upper panel) and T7E1 digestion (lower panel) are shown on a 2% agarose gel of tibialis anterior muscle samples from WT and  $\Delta$ Ex50 mice 3 weeks after intramuscular injection with AAV9-sgRNA-51 and AAV9-Cas9 expression vectors. Controls were injected with only AAV9-Cas9 not AAV9-sgRNA-51. Black arrowhead in the upper panel indicates the 771bp PCR band. Green arrowheads in the lower panel indicate the cut bands by T7E1 assay. M denotes size marker lane. bp indicates the length of the marker bands. n=4. (B) Genomic deep sequencing analysis of PCR amplicons generated across the exon 51 target site in  $\Delta$ Ex50 mice injected with AAV9-sgRNA-51 and AAV9-Cas9. Sequence of representative indels aligned with sgRNA sequence (indicated in blue) revealing insertions (highlighted in green) and deletions (highlighted in red). Black arrowheads indicate the cleavage site. n=3.

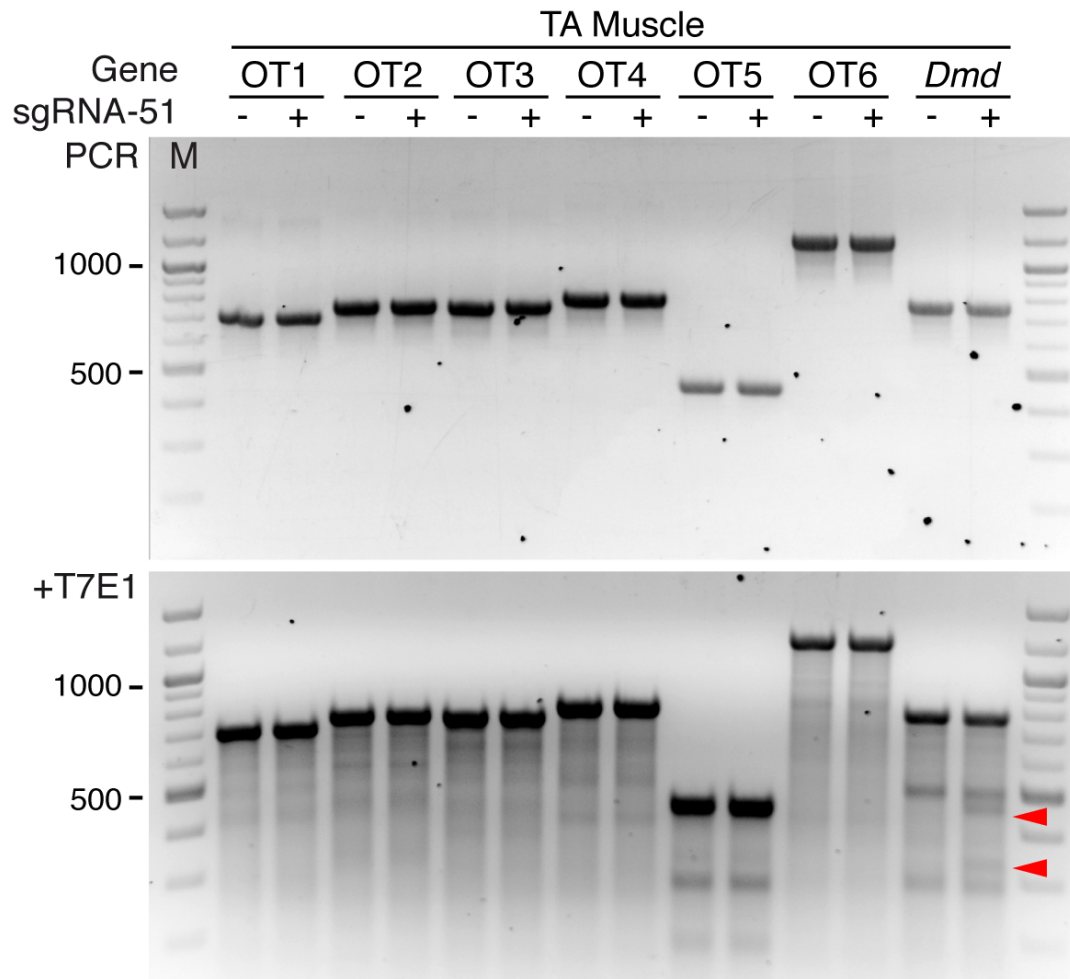

**Fig S8. Off-target analyses for sgRNA-51.** Undigested PCR products and T7E1 digestion from T7E1 assay on *Dmd* (Target) site and genome-wide theoretical exonic off-target sites (OT1 to OT6) in tibialis anterior (TA) muscle. AAV9-Cas9 was injected into TA muscle in the presence (+) or absence (-) of AAV9-sgRNA-51 and gene editing was monitored by T7E1 assay. Undigested PCR products (upper panel) and T7E1 digestion (lower panel) are shown on a 2% agarose gel. Red arrowheads in the lower panel indicate the cut bands by the T7E1 assay. M denotes size marker lane in base pairs.



OT1

R GTCAGTGCAGCCAGTGCAGACGGTTAGTCGAGGGGT  
1 GTCAGTGCAGCCAGTGCAGACGGTTAGTCGAGGGGT  
2 GTCAGTGCAGCCAGTGCAGACGGTTAGTCGAGGGGT  
3 GTCAGTGCAGCCAGTGCAGACGGTTAGTCGAGGGGT  
4 GTCAGTGCAGCCAGTGCAGACGGTTAGTCGAGGGGT  
5 GTCAGTGCAGCCAGTGCAGACGGTTAGTCGAGGGGT  
6 GTCAGTGCAGCCAGTGCAGACGGTTAGTCGAGGGGT  
7 GTCAGTGCAGCCAGTGCAGACGGTTAGTCGAGGGGT  
8 GTCAGTGCAGCCAGTGCAGACGGTTAGTCGAGGGGT  
9 GTCAGTGCAGCCAGTGCAGACGGTTAGTCGAGGGGT  
10 GTCAGTGCAGCCAGTGCAGACGGTTAGTCGAGGGGT  
11 GTCAGTGCAGCCAGTGCAGACGGTTAGTCGAGGGGT  
12 GTCAGTGCAGCCAGTGCAGACGGTTAGTCGAGGGGT  
13 GTCAGTGCAGCCAGTGCAGACGGTTAGTCGAGGGGT  
14 GTCAGTGCAGCCAGTGCAGACGGTTAGTCGAGGGGT  
15 GTCAGTGCAGCCAGTGCAGACGGTTAGTCGAGGGGT  
16 GTCAGTGCAGCCAGTGCAGACGGTTAGTCGAGGGGT  
17 GTCAGTGCAGCCAGTGCAGACGGTTAGTCGAGGGGT  
18 GTCAGTGCAGCCAGTGCAGACGGTTAGTCGAGGGGT  
19 GTCAGTGCAGCCAGTGCAGACGGTTAGTCGAGGGGT  
20 GTCAGTGCAGCCAGTGCAGACGGTTAGTCGAGGGGT  
21 GTCAGTGCAGCCAGTGCAGACGGTTAGTCGAGGGGT  
22 GTCAGTGCAGCCAGTGCAGACGGTTAGTCGAGGGGT  
23 GTCAGTGCAGCCAGTGCAGACGGTTAGTCGAGGGGT  
24 GTCAGTGCAGCCAGTGCAGACGGTTAGTCGAGGGGT  
25 GTCAGTGCAGCCAGTGCAGACGGTTAGTCGAGGGGT  
26 GTCAGTGCAGCCAGTGCAGACGGTTAGTCGAGGGGT  
27 GTCAGTGCAGCCAGTGCAGACGGTTAGTCGAGGGGT  
28 GTCAGTGCAGCCAGTGCAGACGGTTAGTCGAGGGGT  
29 GTCAGTGCAGCCAGTGCAGACGGTTAGTCGAGGGGT  
30 GTCAGTGCAGCCAGTGCAGACGGTTAGTCGAGGGGT

OT2

R CTCGCCAAGGCTTGTCTCAGACTGGTTCTCTATGGAT  
1 CTCGCCAAGGCTTGTCTCAGACTGGTTCTCTATGGAT  
2 CTCGCCAAGGCTTGTCTCAGACTGGTTCTCTATGGAT  
3 CTCGCCAAGGCTTGTCTCAGACTGGTTCTCTATGGAT  
4 CTCGCCAAGGCTTGTCTCAGACTGGTTCTCTATGGAT  
5 CTCGCCAAGGCTTGTCTCAGACTGGTTCTCTATGGAT  
6 CTCGCCAAGGCTTGTCTCAGACTGGTTCTCTATGGAT  
7 CTCGCCAAGGCTTGTCTCAGACTGGTTCTCTATGGAT  
8 CTCGCCAAGGCTTGTCTCAGACTGGTTCTCTATGGAT  
9 CTCGCCAAGGCTTGTCTCAGACTGGTTCTCTATGGAT  
10 CTCGCCAAGGCTTGTCTCAGACTGGTTCTCTATGGAT  
11 CTCGCCAAGGCTTGTCTCAGACTGGTTCTCTATGGAT  
12 CTCGCCAAGGCTTGTCTCAGACTGGTTCTCTATGGAT  
13 CTCGCCAAGGCTTGTCTCAGACTGGTTCTCTATGGAT  
14 CTCGCCAAGGCTTGTCTCAGACTGGTTCTCTATGGAT  
15 CTCGCCAAGGCTTGTCTCAGACTGGTTCTCTATGGAT  
16 CTCGCCAAGGCTTGTCTCAGACTGGTTCTCTATGGAT  
17 CTCGCCAAGGCTTGTCTCAGACTGGTTCTCTATGGAT  
18 CTCGCCAAGGCTTGTCTCAGACTGGTTCTCTATGGAT  
19 CTCGCCAAGGCTTGTCTCAGACTGGTTCTCTATGGAT  
20 CTCGCCAAGGCTTGTCTCAGACTGGTTCTCTATGGAT  
21 CTCGCCAAGGCTTGTCTCAGACTGGTTCTCTATGGAT  
22 CTCGCCAAGGCTTGTCTCAGACTGGTTCTCTATGGAT  
23 CTCGCCAAGGCTTGTCTCAGACTGGTTCTCTATGGAT  
24 CTCGCCAAGGCTTGTCTCAGACTGGTTCTCTATGGAT  
25 CTCGCCAAGGCTTGTCTCAGACTGGTTCTCTATGGAT  
26 CTCGCCAAGGCTTGTCTCAGACTGGTTCTCTATGGAT  
27 CTCGCCAAGGCTTGTCTCAGACTGGTTCTCTATGGAT  
28 CTCGCCAAGGCTTGTCTCAGACTGGTTCTCTATGGAT  
29 CTCGCCAAGGCTTGTCTCAGACTGGTTCTCTATGGAT  
30 CTCGCCAAGGCTTGTCTCAGACTGGTTCTCTATGGAT

OT3

R ACAGAACCAACTTGACTATCAGGCTGACTGGCC  
1 ACAGAACCAACTTGACTATCAGGCTGACTGGCC  
2 ACAGAACCAACTTGACTATCAGGCTGACTGGCC  
3 ACAGAACCAACTTGACTATCAGGCTGACTGGCC  
4 ACAGAACCAACTTGACTATCAGGCTGACTGGCC  
5 ACAGAACCAACTTGACTATCAGGCTGACTGGCC  
6 ACAGAACCAACTTGACTATCAGGCTGACTGGCC  
7 ACAGAACCAACTTGACTATCAGGCTGACTGGCC  
8 ACAGAACCAACTTGACTATCAGGCTGACTGGCC  
9 ACAGAACCAACTTGACTATCAGGCTGACTGGCC  
10 ACAGAACCAACTTGACTATCAGGCTGACTGGCC  
11 ACGAACCAACTTGACTATCAGGCTGACTGGCC  
12 ACAGAACCAACTTGACTATCAGGCTGACTGGCC  
13 ACAGAACCAACTTGACTATCAGGCTGACTGGCC  
14 ACAGAACCAACTTGACTATCAGGCTGACTGGCC  
15 ACAGAACCAACTTGACTATCAGGCTGACTGGCC  
16 ACAGAACCAACTTGACTATCAGGCTGACTGGCC  
17 ACAGAACCAACTTGACTATCAGGCTGACTGGCC  
18 ACAGAACCAACTTGACTATCAGGCTGACTGGCC  
19 ACAGAACCAACTTGACTATCAGGCTGACTGGCC  
20 ACAGAACCAACTTGACTATCAGGCTGACTGGCC  
21 ACATAACCAACTTGACTATCAGGCTGACTGGCC  
22 ACAGAACCAACTTGACTATCAGGCTGACTGGCC  
23 ACAGAACCAACTTGACTATCAGGCTGACTGGCC  
24 ACAGAACCAACTTGACTATCAGGCTGACTGGCC  
25 ACAGAACCAACTTGACTATCAGGCTGACTGGCC  
26 ACAGAACCAACTTGACTATCAGGCTGACTGGCC  
27 ACAGAACCAACTTGACTATCAGGCTGACTGGCC  
28 ACAGAACCAACTTGACTATCAGGCTGACTGGCC  
29 ACAGAACCAACTTGACTATCAGGCTGACTGGCC  
30 ACAGAACCAACTTGACTATCAGGCTGACTGGCC

OT4

R TCAAGATGAACACTAAACCAACAGTCTGTCAAGGCT  
1 TCAAGATGAACACTAAACCAACAGTCTGTCAAGGCT  
2 TCAAGATGAACACTAAACCAACAGTCTGTCAAGGCT  
3 TCAAGATGAACACTAAACCAACAGTCTGTCAAGGCT  
4 TCAAGATGAACACTAAACCAACAGTCTGTCAAGGCT  
5 TCAAGATGAACACTAAACCAACAGTCTGTCAAGGCT  
6 TCAAGATGAACACTAAACCAACAGTCTGTCAAGGCT  
7 TCAAGATGAACACTAAACCAACAGTCTGTCAAGGCT  
8 TCAAGATGAACACTAAACCAACAGTCTGTCAAGGCT  
9 TCAAGATGAACACTAAACCAACAGTCTGTCAAGGCT  
10 TCAAGATGAACACTAAACCAACAGTCTGTCAAGGCT  
11 TCAAGATGAACACTAAACCAACAGTCTGTCAAGGCT  
12 TCAAGATGAACACTAAACCAACAGTCTGTCAAGGCT  
13 TCAAGATGAACACTAAACCAACAGTCTGTCAAGGCT  
14 TCAAGATGAACACTAAACCAACAGTCTGTCAAGGCT  
15 TCAAGATGAACACTAAACCAACAGTCTGTCAAGGCT  
16 TCAAGATGAACACTAAACCAACAGTCTGTCAAGGCT  
17 TCAAGATGAACACTAAACCAACAGTCTGTCAAGGCT  
18 TCAAGATGAACACTAAACCAACAGTCTGTCAAGGCT  
19 TCAAGATGAACACTAAACCAACAGTCTGTCAAGGCT  
20 TCAAGATGAACACTAAACCAACAGTCTGTCAAGGCT  
21 TCAAGATGAACACTAAACCAACAGTCTGTCAAGGCT  
22 TCAAGATGAACACTAAACCAACAGTCTGTCAAGGCT  
23 TCAAGATGAACACTAAACCAACAGTCTGTCAAGGCT  
24 TCAAGATGAACACTAAACCAACAGTCTGTCAAGGCT  
25 TCAAGATGAACACTAAACCAACAGTCTGTCAAGGCT  
26 TCAAGATGAACACTAAACCAACAGTCTGTCAAGGCT  
27 TCAAGATGAACACTAAACCAACAGTCTGTCAAGGCT  
28 TCAAGATGAACACTAAACCAACAGTCTGTCAAGGCT  
29 TCAAGATGAACACTAAACCAACAGTCTGTCAAGGCT  
30 TCAAGATGAACACTAAACCAACAGTCTGTCAAGGCT

**Fig S9. Off-target sequence analyses for sgRNA-51.** DNA sequence analysis of the genomic PCR amplicons of exonic off-target sites (OT1 to OT4) in tibialis anterior muscle. Black arrowheads indicate the cleavage site.

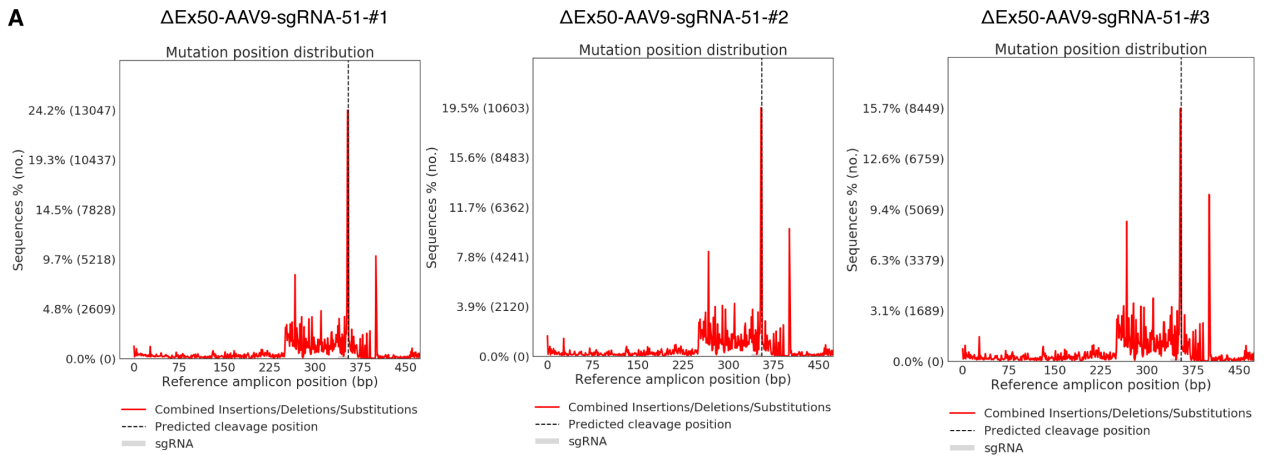

**B**

| Sample                 | PCR  | sgRNA used for analysis | sgRNA sequence used for analysis | Chr.  | Total Reads | Modified Reads | NHEJ (%) | Average NHEJ (%) |
|------------------------|------|-------------------------|----------------------------------|-------|-------------|----------------|----------|------------------|
| ΔEx50-AAV9-sgRNA-51-#1 |      |                         |                                  | chr X | 53969       | 17716          | 32.826   |                  |
| ΔEx50-AAV9-sgRNA-51-#2 | Ex51 | ex51-SA                 | GTCAGACTGTTACTCTAGTG             | chr X | 54494       | 14829          | 27.212   | 27.949±1.876     |
| ΔEx50-AAV9-sgRNA-51-#3 |      |                         |                                  | chr X | 53803       | 12811          | 23.810   |                  |
| ΔEx50-AAV9-sgRNA-51-#1 |      |                         |                                  | chr X | 53969       | 245            | 0.453    |                  |
| ΔEx50-AAV9-sgRNA-51-#2 | Ex51 | NS internal control     | ATGGATAAAACAATAATATT             | chr X | 54494       | 220            | 0.403    | 0.443±0.015      |
| ΔEx50-AAV9-sgRNA-51-#3 |      |                         |                                  | chr X | 53803       | 255            | 0.473    |                  |
| ΔEx50-AAV9-sgRNA-51-#1 |      |                         |                                  | chr5  | 52641       | 184            | 0.349    |                  |
| ΔEx50-AAV9-sgRNA-51-#2 | OT#1 | predicted OT ex51       | GTCAGACGGTTAGTCGAGGG             | chr5  | 47708       | 158            | 0.331    | 0.334±0.005      |
| ΔEx50-AAV9-sgRNA-51-#3 |      |                         |                                  | chr5  | 46582       | 151            | 0.324    |                  |
| ΔEx50-AAV9-sgRNA-51-#1 |      |                         |                                  | chr5  | 51321       | 124            | 0.241    |                  |
| ΔEx50-AAV9-sgRNA-51-#2 | OT#1 | NS internal control     | TAACAGGGCTGGCAAGCCGA             | chr5  | 46500       | 113            | 0.243    | 0.230±0.009      |
| ΔEx50-AAV9-sgRNA-51-#3 |      |                         |                                  | chr5  | 45467       | 94             | 0.206    |                  |
| ΔEx50-AAV9-sgRNA-51-#1 |      |                         |                                  | chr5  | 49202       | 33             | 0.067    |                  |
| ΔEx50-AAV9-sgRNA-51-#2 | OT#2 | predicted OT ex51       | GTCAGACTGTTCTCTATGG              | chr5  | 58293       | 28             | 0.048    | 0.062±0.005      |
| ΔEx50-AAV9-sgRNA-51-#3 |      |                         |                                  | chr5  | 53767       | 28             | 0.0706   |                  |
| ΔEx50-AAV9-sgRNA-51-#1 |      |                         |                                  | chr5  | 43331       | 218            | 0.503    |                  |
| ΔEx50-AAV9-sgRNA-51-#2 | OT#2 | NS internal control     | GAACATCCAAAAATTCATC              | chr5  | 58293       | 223            | 0.382    | 0.365±0.059      |
| ΔEx50-AAV9-sgRNA-51-#3 |      |                         |                                  | chr5  | 55804       | 118            | 0.211    |                  |
| ΔEx50-AAV9-sgRNA-51-#1 |      |                         |                                  | chr2  | 66188       | 119            | 0.179    |                  |
| ΔEx50-AAV9-sgRNA-51-#2 | OT#3 | predicted OT ex51       | GTCAGCCTGATAGTCAAGTG             | chr2  | 56941       | 93             | 0.163    | 0.155±0.012      |
| ΔEx50-AAV9-sgRNA-51-#3 |      |                         |                                  | chr2  | 59680       | 73             | 0.122    |                  |
| ΔEx50-AAV9-sgRNA-51-#1 |      |                         |                                  | chr2  | 66188       | 78             | 0.117    |                  |
| ΔEx50-AAV9-sgRNA-51-#2 | OT#3 | NS internal control     | GACAATGGACCATCTTCCTA             | chr2  | 56941       | 79             | 0.138    | 0.125±0.005      |
| ΔEx50-AAV9-sgRNA-51-#3 |      |                         |                                  | chr2  | 59680       | 72             | 0.120    |                  |

**Fig S10. Amplicon PCR deep sequencing analyses for sgRNA-51.** (A) Representative graph generated by the CRISPResso version 1.0.8 software pipeline during genomic deep sequencing analysis of PCR amplicons generated across the exon 51 target. The left panel y-axis represents % sequence and mutation distribution. The average insertion size (center panel) and average deletion size (right panel) at each nucleotide position across the PCR amplicons are indicated. Dotted lines represent predicted Cas9 cleavage sites. (B) Genomic deep sequencing analysis of PCR amplicons generated across the exon 51 target and exonic off-target sites in tibialis anterior muscle. Mismatches in the target sequence are highlighted in red. Non-specific internal sgRNA sequence, highlighted in grey, were used for analysis to determine the background of the sequencing analysis. n=3.

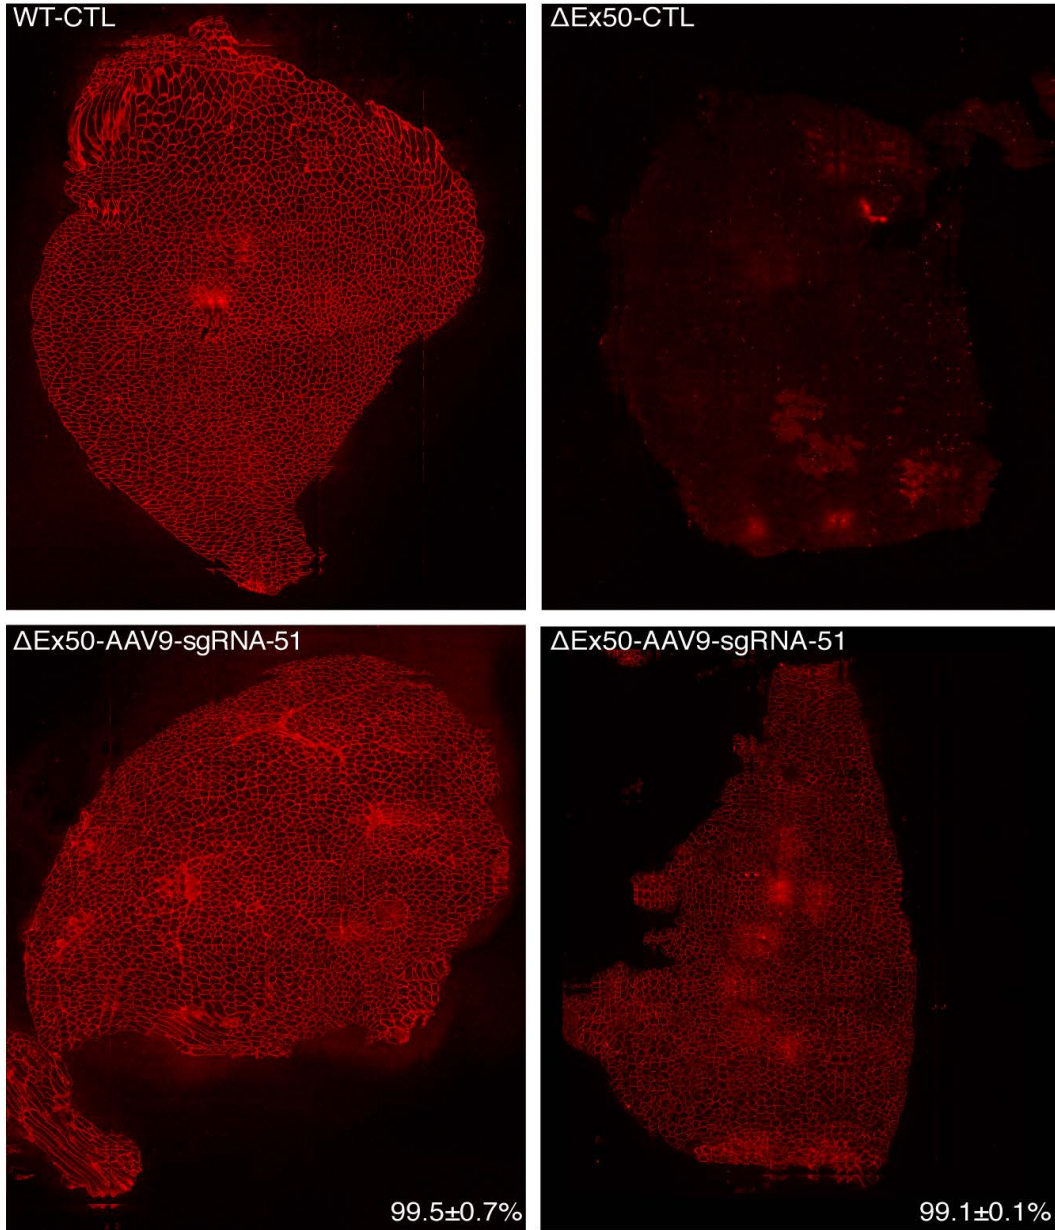

**Fig S11. Rescue of dystrophin expression following intramuscular injections of AAV9-Cas9 and AAV9-sgRNA-51 in  $\Delta$ Ex50 mouse model.** Dystrophin immunohistochemistry of entire tibialis anterior muscle. CTL mice were injected with AAV9-Cas9 alone without AAV9-sgRNA-51. n=5.

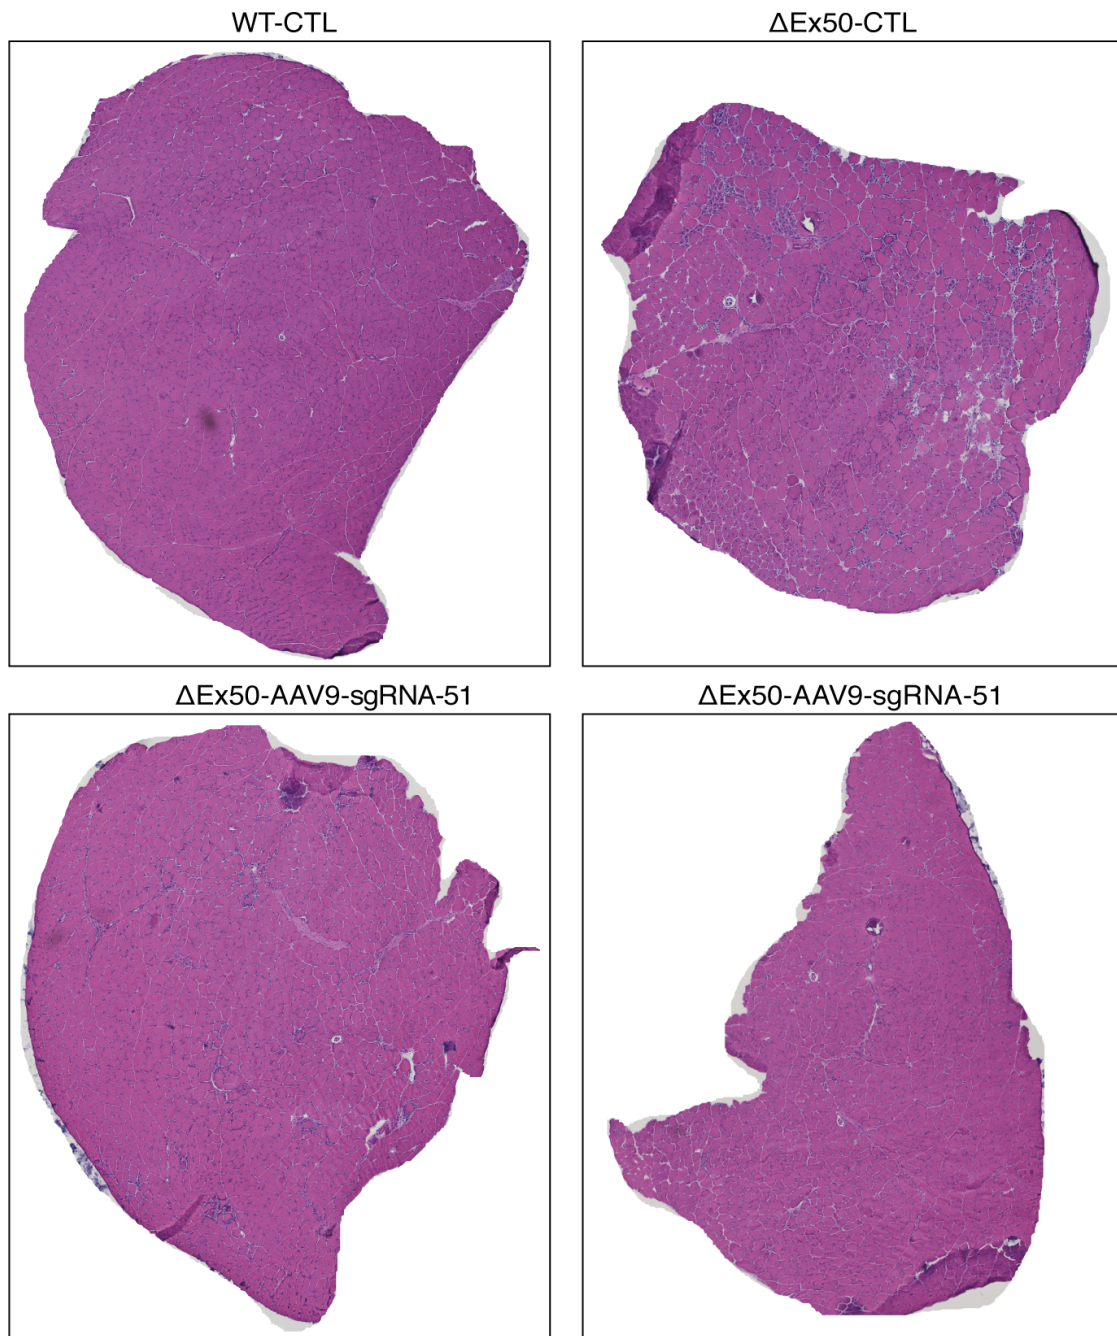

**Fig S12. AAV9-Cas9 and AAV9- sgRNA-51-injected muscle show histological improvement after 3 weeks.** Hematoxylin and eosin (H&E) staining of entire tibialis anterior muscle. CTL mice were injected with AAV9-Cas9 alone without AAV9-sgRNA-51. n=5

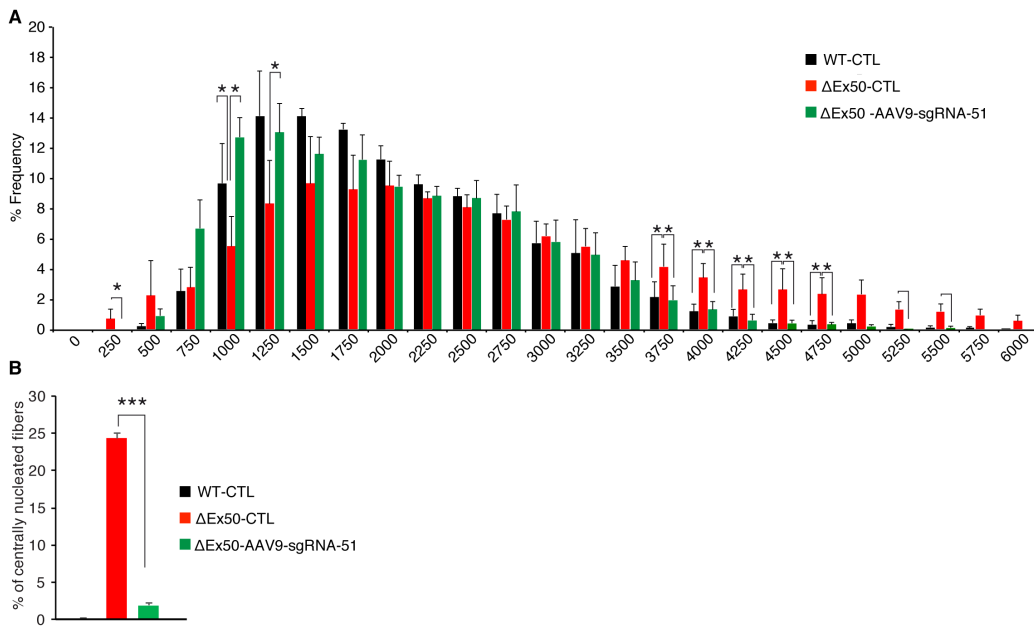

**Fig S13. Quantification of histological improvement of AAV9-Cas9 and AAV9-sgRNA-51-injected muscle from  $\Delta\text{Ex50}$  mice after 3 weeks.** (A) Transverse muscle sections were analyzed for fiber area. Fiber size is grouped into  $250 \mu\text{m}^2$  intervals, and represented as the percentage of total fibers in each group.  $n=3$ . (B) Percentage of centrally nucleated fibers in tibialis anterior muscle of WT,  $\Delta\text{Ex50}$  and  $\Delta\text{Ex50-AAV9-sgRNA-51}$  mice. CTL mice were injected with AAV9-Cas9 alone without AAV9-sgRNA-51.  $n=4$ . Data are represented as mean  $\pm$  SEM. (\* $P<0.05$ , \*\*\* $P<0.0005$ )

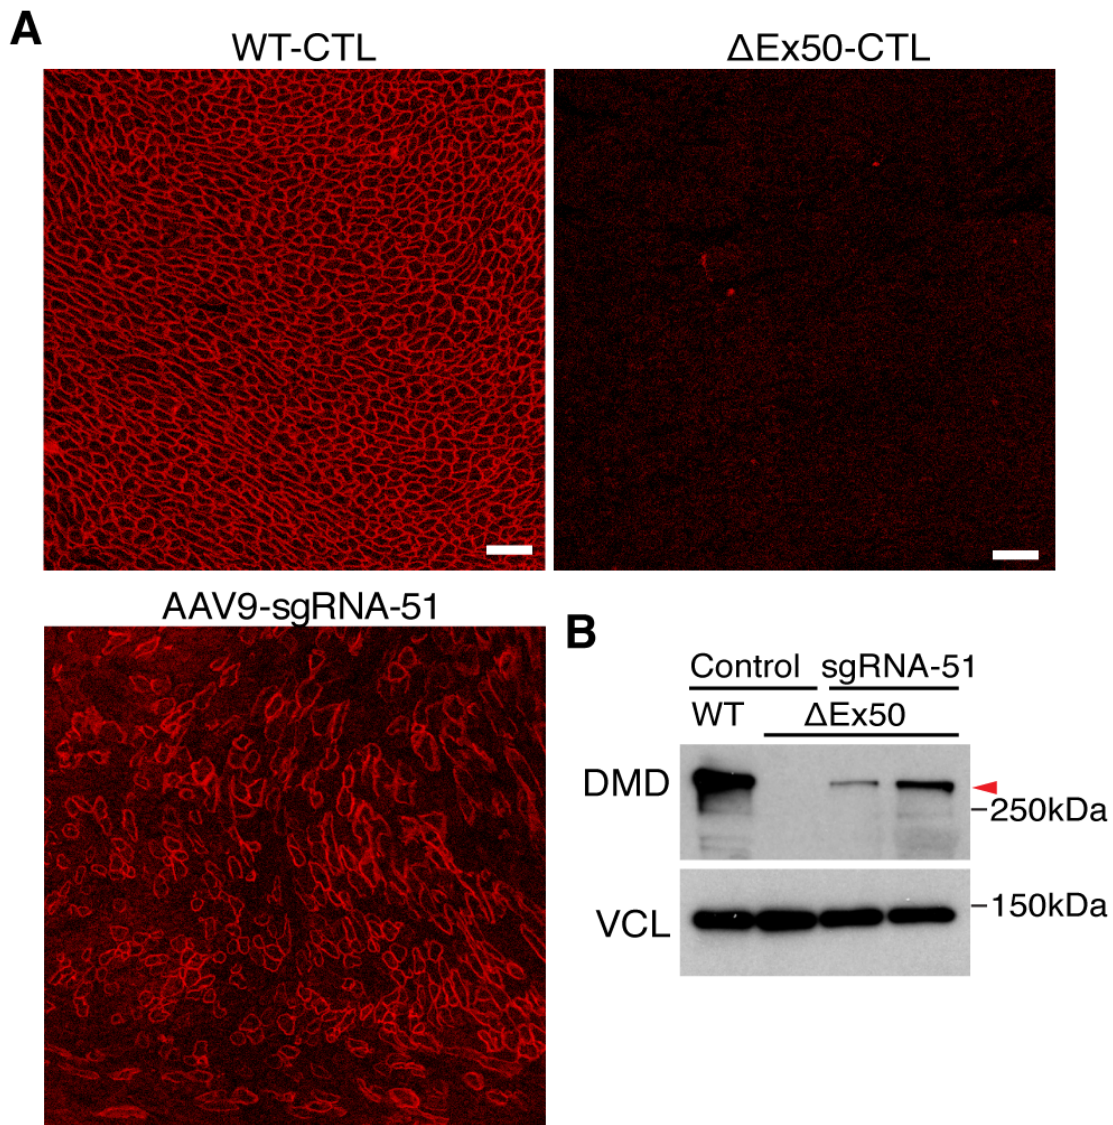

**Fig S14. Intramuscular injections of AAV9-Cas9 and AAV9-sgRNA-51 in  $\Delta$ Ex50 mice corrects dystrophin expression in heart. (A) Dystrophin immunohistochemistry of cardiac muscle. CTL were injected with AAV9-Cas9 alone without AAV9-sgRNA-51. (B) Representative western blot analysis of dystrophin (DMD) and vinculin (VCL) expression in cardiac muscle of two mice for each group. n=5. Scale bar: 50 $\mu$ m.**

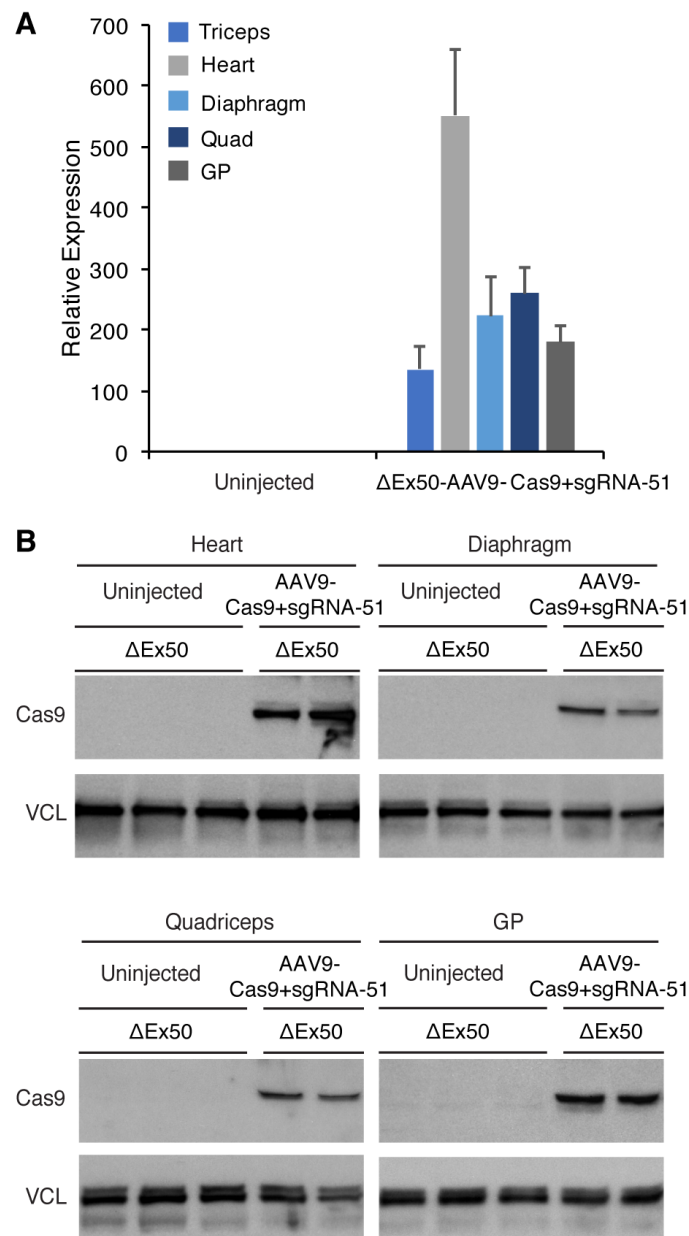

**Fig S15. AAV9-Cas9 expression after systemic delivery in mice.** (A) qPCR analysis of Cas9 expression in triceps, heart, diaphragm, quadriceps and gastrocnemius-plantaris (GP) tissues. n=5. (B) Western blot analysis of Cas9 and vinculin (VCL) expression in heart, diaphragm, quadriceps (Quad) and gastrocnemius-plantaris (GP) tissues 4 weeks after systemic injection.



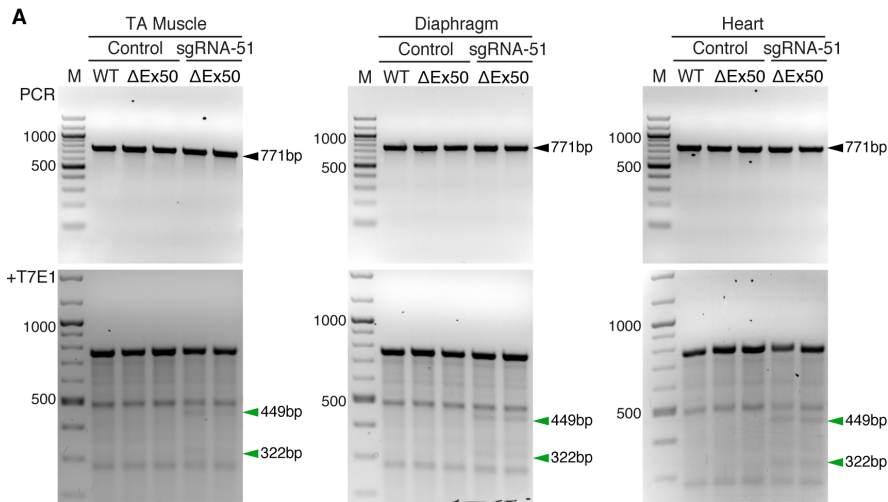

**B Heart-DNA-ΔEx50-AAV9-sgRNA-51-#1**

|        | PAM ▼                                                     | %Reads | #Reads |
|--------|-----------------------------------------------------------|--------|--------|
| (NE)   | acactagCTG <b>CCAGTCAGACTGTTACTCTAGTGACA</b>              | 76.46  | 37332  |
| (+1)   | acactagCTGCCAGTCAAGACTGTTACTCTAGTGACA                     | 10.35  | 5052   |
| (+1S1) | acactagCTGCCAGTCAAGACT <b>TT</b> TACTCTAGTGACA            | 0.61   | 300    |
| (+2)   | acactagCTGCCAGTCA <b>AGACTGTTACTCTAGTGACA</b>             | 0.30   | 148    |
| (-4)   | acactagCTGCCAGT <b>---</b> CTGTTACTCTAGTGACA              | 0.18   | 86     |
| (S1)   | acactagCTGCCAGTCA <b>TA</b> CTGTTACTCTAGTGACA             | 0.16   | 78     |
| (+2)   | acactagCTGCCAGTCA <b>AGACTGTTACTCTAGTGACA</b>             | 0.16   | 76     |
| (S1)   | acactagCTGCCA <b>T</b> CAGACTGTTACTCTAGTGACA              | 0.15   | 75     |
| (-22)  | ac <b>---</b> ACTCTAGTGACA                                | 0.11   | 54     |
| (+13)  | acactagCTGCCAGTCT <b>AGTGT</b> TTTTTTAGACTGTTACTCTAGTGACA | 0.10   | 47     |
| (-10)  | acactagCTGCCAGTCA <b>---</b> CTAGTGACA                    | 0.08   | 40     |
| (-4)   | acactagCTGC <b>---</b> CAGACTGTTACTCTAGTGACA              | 0.08   | 40     |

**Heart-DNA-ΔEx50-AAV9-sgRNA-51-#2**

|       | PAM ▼                                            | %Reads | #Reads |
|-------|--------------------------------------------------|--------|--------|
| (NE)  | acactagCTG <b>CCAGTCAGACTGTTACTCTAGTGACA</b>     | 82.92  | 46216  |
| (+1)  | acactagCTGCCAGTCAAGACTGTTACTCTAGTGACA            | 5.36   | 2985   |
| (S1)  | acactagCTGCCAGTCAAGACT <b>T</b> TACTCTAGTGACA    | 0.75   | 420    |
| (+2)  | acactagCTGCCAGTCA <b>AA</b> AGACTGTTACTCTAGTGACA | 0.39   | 220    |
| (S1)  | acactagCTGCCAGTCA <b>AA</b> ACTGTTACTCTAGTGACA   | 0.19   | 104    |
| (S1)  | acactagCTGCCAGTCA <b>TA</b> CTGTTACTCTAGTGACA    | 0.18   | 99     |
| (S2)  | acactagCTGCCAGTCA <b>TA</b> GACTGTTACTCTAGTGACA  | 0.13   | 73     |
| (-4)  | acactagCTGC <b>---</b> CAGACTGTTACTCTAGTGACA     | 0.11   | 60     |
| (-4)  | acactagCTGCCAGT <b>---</b> CTGTTACTCTAGTGACA     | 0.08   | 42     |
| (-2)  | acactagCTGCCAGT <b>---</b> ACTGTTACTCTAGTGACA    | 0.07   | 39     |
| (-12) | acactagCTGCCAG <b>---</b> TCTAGTGACA             | 0.06   | 33     |
| (-8)  | acactagCTGCCA <b>---</b> GTTACTCTAGTGACA         | 0.05   | 28     |

**Heart-DNA-ΔEx50-AAV9-sgRNA-51-#3**

|        | PAM ▼                                                    | %Reads | #Reads |
|--------|----------------------------------------------------------|--------|--------|
| (NE)   | acactagCTG <b>CCAGTCAGACTGTTACTCTAGTGACA</b>             | 77.54  | 36255  |
| (+1)   | acactagCTGCCAGTCAAGACTGTTACTCTAGTGACA                    | 8.05   | 3763   |
| (+2)   | acactagCTGCCAGTCA <b>AA</b> AGACTGTTACTCTAGTGACA         | 0.95   | 444    |
| (+2)   | acactagCTGCCAGTCA <b>TA</b> GACTGTTACTCTAGTGACA          | 0.72   | 337    |
| (S1)   | acactagCTGCCAGTCAAGACT <b>T</b> TACTCTAGTGACA            | 0.69   | 321    |
| (+1S1) | acactagCTGCCAGTCAAGACT <b>TT</b> TACTCTAGTGACA           | 0.49   | 228    |
| (-1)   | acactagCTGCCAGT <b>---</b> AGACTGTTACTCTAGTGACA          | 0.28   | 129    |
| (S1)   | acactagCTGCCAGT <b>A</b> AGACTGTTACTCTAGTGACA            | 0.26   | 120    |
| (+9)   | acactagCTGCCAGT <b>TACTCTGTT</b> AGACTGTTACTCTAGTGACA    | 0.24   | 113    |
| (+2)   | acactagCTGCCAGTCA <b>CAGACTGTTACTCTAGTGACA</b>           | 0.22   | 102    |
| (-4)   | acactagCTGC <b>---</b> CAGACTGTTACTCTAGTGACA             | 0.20   | 94     |
| (+12)  | acactagCTGCCAGT <b>TACTGTTACTCT</b> AGACTGTTACTCTAGTGACA | 0.11   | 53     |

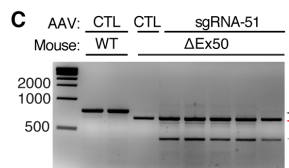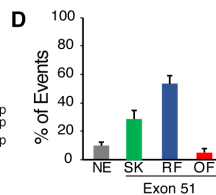

**E Heart-cDNA upper band**

|                                                                                   | Average %reads |
|-----------------------------------------------------------------------------------|----------------|
| <b>49</b> <b>51</b> (+1) AAGCTGCCAGTCA <b>A</b> AGACTGTTACTCTAGTGACACAATCTGTGGTTA | 66.50±3.05     |
| <b>49</b> <b>51</b> (NE) AAGCTGCCAGTCA <b>A</b> AGACTGTTACTCTAGTGACACAATCTGTGGTTA | 24.89±7.53     |

**Fig S16. *Dmd* gene editing 4 weeks after systemic delivery of AAV9-Cas9 and AAV9- sgRNA-51 in mice.** (A) Undigested PCR products (upper panel) and T7E1 digestion (lower panel) are shown on a 2% agarose gel of tibialis anterior (TA), diaphragm and heart muscle samples from WT and  $\Delta$ Ex50 mice 4 weeks after systemic injection with AAV9-sgRNA-51 expression vectors and AAV-Cas9. CTL were injected with AAV9-Cas9 alone without AAV9-sgRNA-51. Black arrowheads in the upper panels indicate the 771bp PCR bands. Green arrowheads in the lower panels indicate the cut bands by T7E1 assay. M denotes size marker lane. bp indicates the length of the marker bands. n=4. (B) Genomic deep sequencing analysis of PCR amplicons generated across the exon 51 target site in heart DNA samples of  $\Delta$ Ex50 mice injected with AAV9-sgRNA-51 and AAV9-Cas9. Sequence of representative indels aligned with sgRNA sequence (indicated in blue) revealing insertions (highlighted in green) and deletions (highlighted in red). Black arrowheads indicate the cleavage site. (C) RT-PCR of RNA from heart samples of WT and  $\Delta$ Ex50 mice 4 weeks after systemic injection with the AAV9-sgRNA and Cas9 expression vectors. Lower bands indicate deletion of exon 51. Primer positions in exons 48 and 53 are indicated (Fw, Rv). (D) Percentage of events detected at exon 51 after AAV9-sgRNA-51 treatment using RT-PCR sequence analysis of TOPO-TA generated clones. For each of 4 different samples, we generated 40 clones. RT-PCR products we divided in 4 groups not-edited (NE), exon51-skipped (SK), reframed (RF) and out of frame (OF). (E) Deep sequencing analysis of RT-PCR products from the upper band containing  $\Delta$ Ex50 not-edited (NE) and  $\Delta$ Ex50-RF. Sequence of RT-PCR products revealing insertions (highlighted in green) and deletions (highlighted in red). n=4.

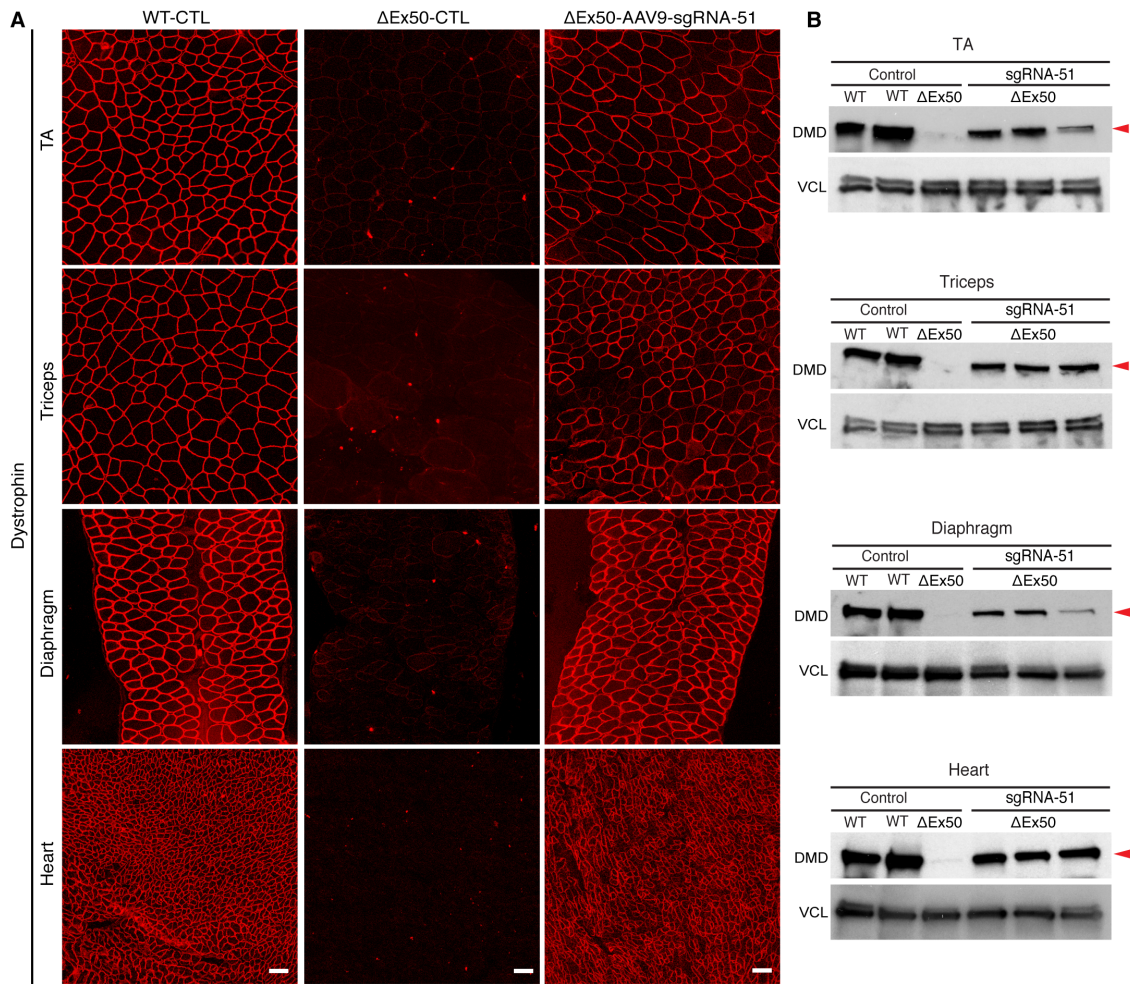

**Fig S17. Rescue of dystrophin expression 8 weeks after systemic delivery of AAV9-Cas9 and AAV9-sgRNA-51 in  $\Delta$ Ex50 mice. (A) Dystrophin immunostaining of tibialis anterior (TA), triceps, diaphragm and cardiac muscles 8 weeks after systemic injection of AAV9-sgRNA-51. (B) Western blot analysis of dystrophin (DMD) and vinculin (VCL) expression in TA, triceps, diaphragm muscles and heart. n=5 for each group. Scale bar: 50 $\mu$ m.**

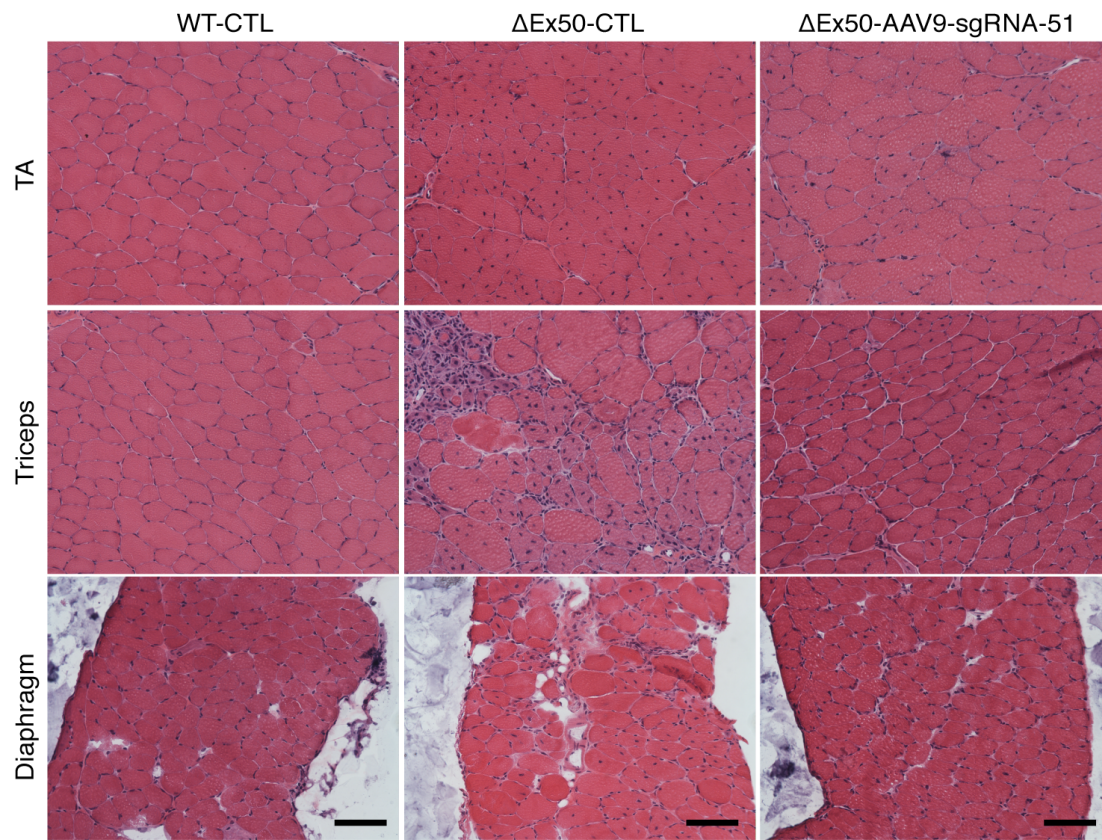

**Fig S18. Histological analysis of dystrophin correction 8 weeks after systemic delivery of AAV9-Cas9 and AAV9-sgRNA-51 in  $\Delta$ Ex50 mice.** Histochemistry of tibialis anterior (TA), triceps and diaphragm muscle by H&E staining, n=3. Scale bar: 50 $\mu$ m.

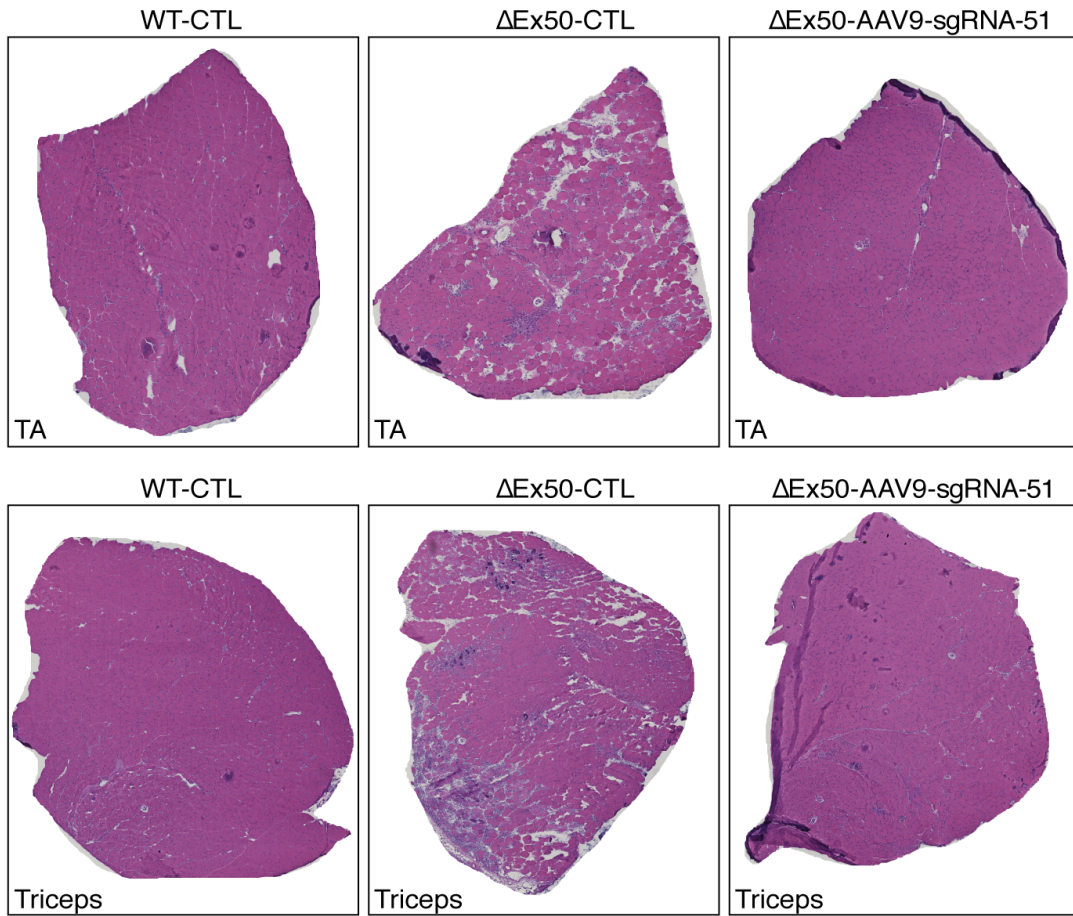

**Fig S19. Histological improvement of  $\Delta$ Ex50 mice 4 weeks after systemic injection of AAV9-Cas9 and AAV9-sgRNA-51.** Hematoxylin and eosin (H&E) staining of entire tibialis anterior (TA) and triceps muscles. CTL were injected with AAV9-Cas9 alone without sgRNA. n=5

## Supplementary Tables

**Table S1.** Sequences of potential exonic off-target (OT) sites in the mouse genome.

|   | All exonic off target sites sequence | Score | Mismatches        | UCSC gene | Locus           |
|---|--------------------------------------|-------|-------------------|-----------|-----------------|
| 1 | CCCTCGACTAACCGTCTGACTGG              | 0.6   | 4MMs [2:5:8:13]   | NM_016926 | chr5:+114194829 |
| 2 | CCATAGAGAACAGTCTGACAAG               | 0.5   | 4MMs [2:3:9:11]   | NM_172880 | chr5:+87174896  |
| 3 | CACTTGACTATCAGGCTGACTGG              | 0.2   | 4MMs [5:8:11:15]  | NM_028809 | chr2:+38870861  |
| 4 | CACTAACCAACAGTCTGTCAGG               | 0.2   | 4MMs [6:8:9:19]   | NR_040363 | chr8:-113667574 |
| 5 | CAATAGGGTATCAATCTGACCAG              | 0.1   | 4MMs [3:7:11:14]  | NM_172951 | chr12:-30859804 |
| 6 | CACTAGAGGAACAGAGTCACTGG              | 0     | 4MMs [9:15:16:18] | NM_009502 | chr14:+21851627 |

Mismatches in the target sequence are highlighted in red.

**Table S2.** Sequences of top 45 off-target (OT) sites in the mouse genome.

| #  | Sequence                 | Score | Mismatches        | UCSC gene | Locus            |
|----|--------------------------|-------|-------------------|-----------|------------------|
| 1  | GACTTTAGTAACAGTCTGACAGG  | 1.5   | 3MMs [1:5:6]      |           | chr5:+12910014   |
| 2  | AACAGGTGTAACAGTCTGACGGG  | 0.9   | 4MMs [1:4:5:7]    |           | chr6:-39148523   |
| 3  | CACGAGAGCACAGTCTGACTGG   | 0.9   | 3MMs [4:9:11]     |           | chr4:-139770221  |
| 4  | ACCTAGAAGAACAGTCTGACTAG  | 0.9   | 4MMs [1:2:8:9]    |           | chr4:+31992687   |
| 5  | GAAAAGAGAAACAGTCTGACAGG  | 0.8   | 4MMs [1:3:4:9]    |           | chr6:+93420151   |
| 6  | GACTTGAGCCACAGTCTGACCGG  | 0.8   | 4MMs [1:5:9:10]   |           | chr19:+58410134  |
| 7  | CTCCACAGTTACAGTCTGACCAG  | 0.8   | 4MMs [2:4:6:10]   |           | chr4:-132987789  |
| 8  | CACAGGAGAGACAGTCTGACAGG  | 0.8   | 4MMs [4:5:9:10]   |           | chr14:+47694929  |
| 9  | CACAAGACTCAAAGTCTGACAAG  | 0.6   | 4MMs [4:8:10:12]  |           | chr3:-19123041   |
| 10 | CCCCAGGGAAACAGTCTGACAGG  | 0.6   | 4MMs [2:4:7:9]    |           | chr11:-66106190  |
| 11 | CCCTCGACTAACCCTGCTGACTGG | 0.6   | 4MMs [2:5:8:13]   | NM_016926 | chr5:+114194829  |
| 12 | AATTAGAGTGACAGTCTGACCAG  | 0.6   | 4MMs [1:3:10:17]  |           | chr2:+134267774  |
| 13 | GGCTAGAGTTACGGTCTGACTGG  | 0.5   | 4MMs [1:2:10:13]  |           | chr1:+137500176  |
| 14 | CTCAAGATTAACAGTCTGGCAGG  | 0.5   | 4MMs [2:4:8:19]   |           | chr8:+89915056   |
| 15 | TAGTAGAGAAGCAGTCTGACTAG  | 0.5   | 4MMs [1:3:9:11]   |           | chr11:-51429578  |
| 16 | AGCTAGGGTAACAGTCTGAATAG  | 0.5   | 4MMs [1:2:7:20]   |           | chrX:+123650835  |
| 17 | TCCTAGGGTAACAGTCTGAACAG  | 0.5   | 4MMs [1:2:7:20]   |           | chr1:-195484703  |
| 18 | CCATAGAGAACCAGTCTGACAAG  | 0.5   | 4MMs [2:3:9:11]   | NM_172880 | chr5:+87174896   |
| 19 | AACTACAGTGTACAGTCTGACAGG | 0.4   | 4MMs [1:6:10:11]  |           | chr12:-41095983  |
| 20 | AACTGAAGTAACAGTCTGAATGG  | 0.4   | 4MMs [1:5:6:20]   |           | chr10:+67936212  |
| 21 | CACAAAAGTGGCAGTCTGACAGG  | 0.4   | 4MMs [4:6:10:11]  |           | chr13:+113568808 |
| 22 | GCCTAGATTAACAGGCTGACGGG  | 0.4   | 4MMs [1:2:8:15]   |           | chr11:+8453241   |
| 23 | CACTCGTGTACAGTCTGAATAG   | 0.4   | 4MMs [5:7:10:20]  |           | chr15:+3352089   |
| 24 | GACTATAGTCATAGTCTGACTGG  | 0.4   | 4MMs [1:6:10:12]  |           | chr14:+123509659 |
| 25 | TACTACAGTTAAAGTCTGACCAG  | 0.4   | 4MMs [1:6:10:12]  |           | chr1:-39197660   |
| 26 | CCATAGTGTAACTGTCTGACTAG  | 0.4   | 4MMs [2:3:7:13]   |           | chr12:+87163814  |
| 27 | AAGTAGAGTGACAGGCTGACAGG  | 0.4   | 4MMs [1:3:10:15]  |           | chr3:-70665468   |
| 28 | CCCCAGAGAAACAGTCTGACAGG  | 0.4   | 4MMs [2:4:9:17]   |           | chr14:-17330765  |
| 29 | CACTGAAGTTACAGTCTGATCGG  | 0.4   | 4MMs [5:6:10:20]  |           | chr10:+117084662 |
| 30 | CACAAGAAAAACTGTCTGACAAG  | 0.3   | 4MMs [4:8:9:13]   |           | chr18:+74824438  |
| 31 | CAATACAGTCACAGTCTGACAAG  | 0.3   | 4MMs [3:6:10:17]  |           | chr17:-38068956  |
| 32 | CAGTAGAGTCAAAGTCTGAGGAG  | 0.3   | 4MMs [3:10:12:20] |           | chr9:-100294992  |
| 33 | AAGTAGAGTAAGAGTCTGACAAG  | 0.3   | 4MMs [1:3:12:17]  |           | chr1:+170850566  |
| 34 | CACTGGAGTCTGAGTCTGATCGG  | 0.3   | 4MMs [5:10:12:20] |           | chr18:-39033098  |
| 35 | GACTAGAGCCACAGTCTGTCCGG  | 0.3   | 4MMs [1:9:10:19]  |           | chr12:-8868558   |
| 36 | CACTGTAGTTACAGTCTGGCTAG  | 0.3   | 4MMs [5:6:10:19]  |           | chr6:+14422702   |
| 37 | CACTAGGTAACATTCTGACAAG   | 0.3   | 3MMs [7:8:14]     |           | chr8:+65459205   |
| 38 | CCCTAGACTAAGAGTCTGGCAAG  | 0.3   | 4MMs [2:8:12:19]  |           | chr9:+7157367    |
| 39 | CCCTAGACTAAGAGTCTGGCAAG  | 0.3   | 4MMs [2:8:12:19]  |           | chr9:+7157311    |
| 40 | AACTAGAGTGACTGTCTGATTAG  | 0.3   | 4MMs [1:10:13:20] |           | chr19:-4529462   |
| 41 | CACAAGAGTAATAGTGTGACAGG  | 0.3   | 3MMs [4:12:16]    |           | chr8:+20011535   |
| 42 | CACAAGAGTAATAGTGTGACAGG  | 0.3   | 3MMs [4:12:16]    |           | chr8:-19793456   |
| 43 | CACAAGAGTAATAGTGTGACAGG  | 0.3   | 3MMs [4:12:16]    |           | chr8:+19884248   |
| 44 | CTCCACAGTAACAGGCTGACGAG  | 0.2   | 4MMs [2:4:6:15]   |           | chr19:+23293758  |
| 45 | CAGTGGAGGAACAGACTGACGAG  | 0.2   | 4MMs [3:5:9:15]   |           | chr7:-73086063   |

**Table S3.** Primer sequences.

| Experiment                                              | Primer Name                                                                                                                                                                                                                                          | Primer sequence                                                                                                                                                                                                                                                                                                                                                                                                                                                                                                                                                                                                                                                                                                                                                                                                                                                                                                                                                    |
|---------------------------------------------------------|------------------------------------------------------------------------------------------------------------------------------------------------------------------------------------------------------------------------------------------------------|--------------------------------------------------------------------------------------------------------------------------------------------------------------------------------------------------------------------------------------------------------------------------------------------------------------------------------------------------------------------------------------------------------------------------------------------------------------------------------------------------------------------------------------------------------------------------------------------------------------------------------------------------------------------------------------------------------------------------------------------------------------------------------------------------------------------------------------------------------------------------------------------------------------------------------------------------------------------|
| sgRNA for exon 50 deletion                              | <i>Dmd</i> ex50-g1-Top<br><i>Dmd</i> ex50-g1-Bottom<br><i>Dmd</i> ex50-g2-Top<br><i>Dmd</i> ex50-g2-Bottom                                                                                                                                           | 5'-CACCGAATGATGAGTGAAGTTATAT-3'<br>5'-AAACATATAAATTCACATCATTTTC-3'<br>5' CACCGTTTTGTTCAAAGCGTGGCT-3'<br>5'- AAACAGCCACGCTTTTGAACAAAC-3'                                                                                                                                                                                                                                                                                                                                                                                                                                                                                                                                                                                                                                                                                                                                                                                                                            |
| T7 in vitro transcription primers                       | <i>Dmd</i> ex50-T7-F1<br><i>Dmd</i> ex50-T7-F2<br><i>Dmd</i> ex50-T7-Rv                                                                                                                                                                              | 5'-GAATTGTAATACGACTCACTATAGGAATGATGAGTGAAGTTATAT-3'<br>5'-GAATTGTAATACGACTCACTATAGGGTTTTGTTCAAAGCGTGGCT-3'<br>5'-AAAAGCACCGACTCGGTGCCAC-3'                                                                                                                                                                                                                                                                                                                                                                                                                                                                                                                                                                                                                                                                                                                                                                                                                         |
| Genotyping of Δ Ex50 mice                               | Geno-ex50-F<br>Geno-ex50-R                                                                                                                                                                                                                           | 5'-GGATTGACTGAAATGATGGCCAAGG-3'<br>5'-CTGCCACGATTACTCTGCTCCAG-3'                                                                                                                                                                                                                                                                                                                                                                                                                                                                                                                                                                                                                                                                                                                                                                                                                                                                                                   |
| sgRNA for mouse exon 51                                 | <i>Dmd</i> M-ex51-Top<br><i>Dmd</i> M-ex51-Bottom                                                                                                                                                                                                    | 5'-CACCGCACTAGAGTAACAGTCTGAC-3'<br>5'-AAACCCAGTCAGACTGTTACTCTC-3'                                                                                                                                                                                                                                                                                                                                                                                                                                                                                                                                                                                                                                                                                                                                                                                                                                                                                                  |
| sgRNA for human exon 51                                 | <i>Dmd</i> H-ex51-Top<br><i>Dmd</i> H-ex51-Bottom                                                                                                                                                                                                    | 5'-CACCGCACAGAGTAACAGTCTGAG-3'<br>5'-AAACCTCAGACTGTTACTCTGGTGC-3'                                                                                                                                                                                                                                                                                                                                                                                                                                                                                                                                                                                                                                                                                                                                                                                                                                                                                                  |
| Primers for T7E1 mouse exon51                           | <i>Dmd</i> M-ex51-T7E1-F<br><i>Dmd</i> M-ex51-T7E1-R                                                                                                                                                                                                 | 5'-GATAAATCCTGAAAATTCGCCAATA -3'<br>5'-TTTCACCCTAATTTTCATCCCTT-3'                                                                                                                                                                                                                                                                                                                                                                                                                                                                                                                                                                                                                                                                                                                                                                                                                                                                                                  |
| Primers for T7E1 human exon51                           | <i>Dmd</i> H-ex51-T7E1-F<br><i>Dmd</i> H-ex51-T7E1-R                                                                                                                                                                                                 | 5'-TTCCCTGGCAAGGTCTGA -3'<br>5'-ATCCTCAAGGTCAACCACC-3'                                                                                                                                                                                                                                                                                                                                                                                                                                                                                                                                                                                                                                                                                                                                                                                                                                                                                                             |
| RT-PCR primer flanking exon 48 and exon 53              | <i>Dmd</i> -ex48-F<br><i>Dmd</i> -ex52-R                                                                                                                                                                                                             | 5'- AGGTTCACTTAAAGATTTTAGGCAG-3'<br>5'-TAACATTTTCATTCAACTGTTGTCTCC-3'                                                                                                                                                                                                                                                                                                                                                                                                                                                                                                                                                                                                                                                                                                                                                                                                                                                                                              |
| Primers for exon off-targets sites of sgRNA-SA          | OT1-T7E1-F<br>OT1-T7E1-R<br>OT2-T7E1-F<br>OT2-T7E1-R<br>OT3-T7E1-F<br>OT3-T7E1-R<br>OT4-T7E1-F<br>OT4-T7E1-R<br>OT5-T7E1-F<br>OT5-T7E1-R<br>OT6-T7E1-F<br>OT6-T7E1-R                                                                                 | 5'-GAGAAACACAAACTCTCATCTCTG -3'<br>5'-CTGACTCTGAGTCTCAGCAATG-3'<br>5'-TTCCAACAGAGGCTTATAGTTAATTC -3'<br>5'-TACATCACTGTCTCTTACATTTTG -3'<br>5'-AGGCTCCATTATAAGAGTCTTACAG -3'<br>5'-GAAAAATAAACACTCAGCAAAAGGTC-3'<br>5'-TTAAAGCCAAACAGAAAGAACTCTG -3'<br>5'-CCTCAGTCGTGTAATAATTAAGTC-3'<br>5'-TCTTAAGAACTAATCTTTCCTGCAC -3'<br>5'-ATTCAAATTCCTCTTCACTCTATTTC-3'<br>5'-TCTCTCTATAAACCCGTACTTTTCAG -3'<br>5'-ACTTTTACACTAATTTGCCCAATAG-3'                                                                                                                                                                                                                                                                                                                                                                                                                                                                                                                              |
| Primers for Mi-Seq Genomic DNA Amplicon Deep Sequencing | <i>Dmd</i> M-ex51-Mi-seq-F<br><i>Dmd</i> M-ex51-Mi-seq-R<br>OT1-Mi-seq-F<br>OT1-Mi-seq-R<br>OT2-Mi-seq-F<br>OT2-Mi-seq-R<br>OT3-Mi-seq-F<br>OT3-Mi-seq-R<br>OT5-Mi-seq-F<br>OT5-Mi-seq-R<br><i>Dmd</i> H-ex51-Mi-seq-F<br><i>Dmd</i> H-ex51-Mi-seq-R | 5'-TCGTCGGCAGCGTCAGATGTGTATAAGAGACAGGAAATTTACCTCAAATGTTGCTTC-3'<br>5'-GTCTCGTGGGCTCGGAGATGTGTATAAGAGACAGATGAATAGTGTGTTCCAGAGAAAAG-3'<br>5'-TCGTCGGCAGCGTCAGATGTGTATAAGAGACAGCTCAGGCTGGTCAACAG-3'<br>5'-GTCTCGTGGGCTCGGAGATGTGTATAAGAGACAGCTTGTATGACATTCTCTGTATGGTC-3'<br>5'-TCGTCGGCAGCGTCAGATGTGTATAAGAGACAGGAGGCTGAGAGGCATAACTC-3'<br>5'-GTCTCGTGGGCTCGGAGATGTGTATAAGAGACAGAAACAGTCAGATATAGATCCTTGAGTG-3'<br>5'-TCGTCGGCAGCGTCAGATGTGTATAAGAGACAGTGTACCTTGAGAAGAAATTTGGATG-3'<br>5'-GTCTCGTGGGCTCGGAGATGTGTATAAGAGACAGGCTGTACAACTCTCAGGTTTTTC-3'<br>5'-TCGTCGGCAGCGTCAGATGTGTATAAGAGACAGTCTTAAGAACTAATCTTTCCTGCAC-3'<br>5'-GTCTCGTGGGCTCGGAGATGTGTATAAGAGACAGATTCAAATTCCTCTCACTCTATTTC-3'<br>5'-TCGTCGGCAGCGTCAGATGTGTATAAGAGACAGTTAACTTAAGTACTTGTCCAGGC-3'<br>5'-GTCTCGTGGGCTCGGAGATGTGTATAAGAGACAGTTAACTTATGATCAAGCAGAGAAAAGC-3'                                                                                                                               |
| Primers for Mi-Seq cDNA Amplicon Deep Sequencing        | <i>Dmd</i> M-ex51-Mi-seq-F<br><i>Dmd</i> M-ex51-Mi-seq-R                                                                                                                                                                                             | 5'-TCGTCGGCAGCGTCAGATGTGTATAAGAGACAAGTGGAAATTTATAACCAACCAAGTCAG-3'<br>5'-GTCTCGTGGGCTCGGAGATGTGTATAAGAGACAGGATCAGTAATGATTGTTCTAGCTTC-3'                                                                                                                                                                                                                                                                                                                                                                                                                                                                                                                                                                                                                                                                                                                                                                                                                            |
| Primers for Mi-Seq for PCR with Bar Codes               | Univ-F<br>BC1-R<br>BC2-R<br>BC3-R<br>BC4-R<br>BC5-R<br>BC6-R<br>BC7-R<br>BC8-R<br>BC9-R<br>BC10-R<br>BC11-R<br>BC12-R<br>BC13-R<br>BC14-R<br>BC15-R<br>BC16-R                                                                                        | 5'-AATGATACGGCACCACCGAGATCTACACTCGTCGGCAGCGTC-3'<br>5'-CAAGCAGAAGACGGCATAACGAGATACATCGGCTCGTGGGCTCGG-3'<br>5'-CAAGCAGAAGACGGCATAACGAGATTGGTCAAGTCTCGTGGGCTCGG-3'<br>5'-CAAGCAGAAGACGGCATAACGAGATCACTGTGCTCGTGGGCTCGG-3'<br>5'-CAAGCAGAAGACGGCATAACGAGATATTGGGCTCGTGGGCTCGG-3'<br>5'-CAAGCAGAAGACGGCATAACGAGATGATCTGCTCGTGGGCTCGG-3'<br>5'-CAAGCAGAAGACGGCATAACGAGATTACAAGGCTCGTGGGCTCGG-3'<br>5'-CAAGCAGAAGACGGCATAACGAGATCGTGATGCTCGTGGGCTCGG-3'<br>5'-CAAGCAGAAGACGGCATAACGAGATGCCTAAGTCTCGTGGGCTCGG-3'<br>5'-CAAGCAGAAGACGGCATAACGAGATTCAGTCTCGTGGGCTCGG-3'<br>5'-CAAGCAGAAGACGGCATAACGAGATAGCTAGGCTCGTGGGCTCGG-3'<br>5'-CAAGCAGAAGACGGCATAACGAGATGTCGTCGCTCGTGGGCTCGG-3'<br>5'-CAAGCAGAAGACGGCATAACGAGATCGATTAGTCTCGTGGGCTCGG-3'<br>5'-CAAGCAGAAGACGGCATAACGAGATGAATGAGTCTCGTGGGCTCGG-3'<br>5'-CAAGCAGAAGACGGCATAACGAGATCTTCGAGTCTCGTGGGCTCGG-3'<br>5'-CAAGCAGAAGACGGCATAACGAGATCTCTACGCTCGTGGGCTCGG-3'<br>5'-CAAGCAGAAGACGGCATAACGAGATAGGAATGCTCGTGGGCTCGG-3' |
